# Supplementary material for: The MADS-box genes SOC1 and AGL24 antagonize XAL2 functions in Arabidopsis thaliana root development
Source: Front Plant Sci. 2024 Mar 21;15:1331269. doi: 10.3389/fpls.2024.1331269 (PMC10994003; doi:10.3389/fpls.2024.1331269)
Supplement: Supplementary file 4 [file Table_7.xlsx]

## Sheet: DEGs Log2FoldChange >1.5
ID	baseMean	log2FoldChange	lfcSE	stat	pvalue	padj	Gen
AT1G75945	42.2741	-9.50598	1.24954	-7.60757	2.79302e-14	1.92412e-11	hypothetical protein	Downregulated
AT3G06020	20.1055	-7.56278	1.30676	-5.78743	7.14701e-09	1.55747e-06	FAF4
AT2G36710	11.1678	-4.45224	1.4314	-3.1104	0.00186835	0.0495659	PME15
AT5G65080	33.6091	-3.66297	0.565044	-6.48262	9.01455e-11	2.87335e-08	MAF5
AT3G57670	28.0463	-3.59352	0.660666	-5.43924	5.35086e-08	9.52274e-06	WIP2
AT4G11880	6890.12	-3.48195	0.281181	-12.3833	3.2175e-35	1.14522e-31	AGL14
AT1G22480	9.29047	-3.29961	1.0271	-3.21256	0.00131557	0.0388594	x
AT1G21670	231.008	-3.25613	0.239724	-13.5828	5.06226e-42	2.70274e-38	x
AT1G55210	1778.82	-3.18595	0.14696	-21.6791	3.23028e-104	3.44929e-100	DIR20
AT4G33720	155.755	-3.05031	0.41134	-7.41554	1.21128e-13	7.51825e-11	x
AT5G33355	12.6199	-2.46201	0.730078	-3.37225	0.000745558	0.0262856	x
AT3G15800	41.6518	-2.4475	0.531649	-4.6036	4.1524e-06	0.00042634	x
AT5G24220	19.3652	-2.33179	0.71798	-3.24771	0.00116338	0.0359035	x
AT4G37950	47.5672	-2.16084	0.407372	-5.30433	1.13086e-07	1.81583e-05	x
AT4G13310	39.9289	-2.14863	0.561562	-3.82617	0.000130151	0.00725719	CYP71A20
AT4G04990	179.278	-2.06096	0.277794	-7.41902	1.17994e-13	7.51825e-11	x
AT1G74810	23.2079	-2.05794	0.627016	-3.28212	0.00103031	0.0326748	BOR5
AT1G75620	110.395	-1.90661	0.323301	-5.89732	3.69459e-09	9.17461e-07	x
AT3G17130	26.1038	-1.89456	0.602082	-3.14669	0.00165132	0.04574	x
AT3G29250	4213.03	-1.88824	0.133797	-14.1128	3.16849e-45	2.25555e-41	SDR4
AT3G62740	184.915	-1.68298	0.250606	-6.71565	1.87233e-11	6.77721e-09	BGLU7
AT4G11020	43.4806	-1.65362	0.452738	-3.65249	0.000259705	0.0120833	x
AT1G05650	223.842	-1.6527	0.228939	-7.21897	5.2381e-13	2.72841e-10	x
AT3G04010	803.231	-1.6446	0.179579	-9.15809	5.28241e-20	8.05794e-17	x
AT5G46050	134.998	-1.61065	0.336506	-4.78641	1.69793e-06	0.00020145	NPF5.2
AT1G77690	1899.35	-1.60559	0.131411	-12.2181	2.4894e-34	7.59479e-31	LAX3
AT5G65070	39.8804	-1.58687	0.41769	-3.79917	0.000145183	0.00783983	MAF4
AT5G23840	550.948	-1.58641	0.15856	-10.0051	1.44729e-23	3.86353e-20	x
AT5G62165	198.607	-1.55147	0.210756	-7.36147	1.81902e-13	1.02229e-10	AGL42
AT5G42930	97.2296	-1.52196	0.295538	-5.14979	2.60785e-07	3.71289e-05	x
AT4G37700	167.85	-1.50231	0.205462	-7.31188	2.63432e-13	1.44253e-10	x
AT4G05275	72.2134	10.1578	1.22028	8.32418	8.4918e-17	9.06755e-14	x	Upregulated
AT1G34440	20.6636	8.25842	2.57587	3.20607	0.00134561	0.0395279	x
AT4G04223	23.1158	7.50741	1.29096	5.81535	6.05071e-09	1.37764e-06	x
AT2G06995	19.3443	6.61826	1.28101	5.16643	2.38613e-07	3.42001e-05	x
AT5G09570	13.6535	6.29251	1.33077	4.72846	2.26226e-06	0.000254036	x
AT1G66940	5.42633	6.22968	1.84724	3.37242	0.000745106	0.0262856	x
AT5G53230	4.51195	6.16456	1.7379	3.54714	0.00038944	0.0165017	x
AT3G05955	23.7939	6.09245	0.984064	6.19111	5.97431e-10	1.61503e-07	x
AT5G05770	7.24341	5.93803	1.44887	4.0984	4.1601e-05	0.00297134	WOX7
AT5G50915	4.96575	5.88304	1.66819	3.52661	0.000420915	0.0176161	BHLH137
AT2G24255	3.49531	5.74444	1.73833	3.30457	0.000951211	0.0310536	x
AT3G07920	6.46369	5.2776	1.44555	3.65092	0.000261302	0.0121312	x
AT1G73000	9.02068	4.84324	1.4273	3.39329	0.000690574	0.0250389	PYL3
AT5G65410	8.85793	4.6062	1.45401	3.16792	0.00153533	0.0435439	ZHD1
AT1G18830	10.0798	4.24083	1.12206	3.77952	0.000157128	0.00834732	SEC31A
AT2G30670	13.53	4.1653	1.19761	3.478	0.000505165	0.0199046	x
AT5G24240	725.853	4.15512	0.165783	25.0636	1.23979e-138	2.6477e-134	PI4KG3
AT5G60250	70.2456	3.77433	0.411783	9.16584	4.91622e-20	8.05794e-17	x
AT2G04190	21.9668	3.70852	0.992572	3.73628	0.000186766	0.00954202	x
AT2G04070	9.13159	3.56087	0.97179	3.66424	0.000248073	0.0117313	DTX4
AT2G21450	12.5856	3.40941	1.01904	3.34572	0.000820704	0.0279824	CHR34
AT5G04230	19.5219	3.22769	0.654437	4.93201	8.1389e-07	0.000104707	PAL3
AT3G60160	60.7923	3.13658	0.408493	7.67841	1.61081e-14	1.18622e-11	ABCC9
AT2G04050	21.2311	3.01239	0.741857	4.06061	4.89451e-05	0.00343839	DTX3
AT3G05945	35.2955	2.91545	0.511135	5.70387	1.17116e-08	2.50114e-06	x
AT2G28850	13.4689	2.85764	0.814647	3.50783	0.000451785	0.018448	CYP710A3
AT2G20800	49.5909	2.75024	0.413636	6.64895	2.95193e-11	9.87182e-09	NDB4
AT5G52860	25.2737	2.63941	0.699483	3.77337	0.000161055	0.00849256	ABCG8
AT4G26260	38.0135	2.62367	0.573792	4.57252	4.81894e-06	0.000483161	MIOX4
AT4G01830	21.7005	2.50984	0.741306	3.38571	0.000709949	0.0254391	ABCB5
AT5G40990	19.3693	2.47297	0.74391	3.32429	0.000886446	0.0296723	GLIP1
AT4G37220	17.788	2.42536	0.729554	3.32445	0.000885947	0.0296723	x
AT3G28510	72.9322	2.34718	0.400872	5.85518	4.76488e-09	1.13065e-06	x
AT1G21520	16.1341	2.33713	0.70632	3.30888	0.000936692	0.0307754	x
AT2G31081	44.2365	2.32926	0.581875	4.00304	6.25347e-05	0.0041092	CLE4
AT1G71280	26.3101	2.23085	0.554385	4.024	5.7217e-05	0.00381964	RH55
AT2G31085	60.7445	2.21862	0.333696	6.64863	2.9584e-11	9.87182e-09	CLE6
AT4G28850	88.9928	2.1919	0.410682	5.33722	9.43829e-08	1.57472e-05	XTH26
AT5G47600	87.2655	2.16494	0.323549	6.69121	2.21326e-11	7.7486e-09	HSP14.7
AT3G50710	26.2965	2.15502	0.52396	4.11296	3.90624e-05	0.00282785	x
AT1G70260	45.1539	2.08355	0.42882	4.8588	1.18099e-06	0.000146636	x
AT1G75160	31.2982	2.04408	0.614858	3.32447	0.000885868	0.0296723	x
AT1G09080	15.8519	1.97954	0.590255	3.35371	0.000797362	0.0275096	MED37B
AT1G64480	26.8122	1.95359	0.594976	3.28348	0.00102535	0.0325855	CBL8
AT2G30750	824.478	1.87122	0.231308	8.08971	5.98053e-16	5.55305e-13	CYP71A12
AT5G52390	30.6092	1.8549	0.492297	3.76784	0.000164663	0.00864015	x
AT1G54970	308.81	1.79633	0.297673	6.03457	1.59386e-09	4.10102e-07	PRP1
AT1G11655	48.3195	1.78258	0.449284	3.9676	7.25998e-05	0.00457357	x
AT5G24110	44.5837	1.74229	0.539208	3.2312	0.00123271	0.0373946	WRKY30
AT3G47340	846.435	1.7267	0.489671	3.52623	0.000421513	0.0176161	ASN1
AT2G01020	131.122	1.72601	0.239884	7.19519	6.23716e-13	3.17145e-10	x
AT5G17960	39.028	1.71358	0.496128	3.45391	0.000552532	0.0213567	x
AT1G67150	112.665	1.70088	0.375639	4.52796	5.95547e-06	0.000578114	x
AT5G24280	131.541	1.66749	0.307657	5.41997	5.96094e-08	1.04346e-05	GMI1
AT2G21210	21.7843	1.66072	0.512547	3.24013	0.00119475	0.0365758	x
AT5G05340	38.6063	1.64984	0.439179	3.75666	0.000172198	0.00892589	PER52
AT2G38490	43.378	1.61743	0.377495	4.28463	1.8304e-05	0.00149199	CIPK22
AT3G09922	35.3894	1.61623	0.434052	3.72359	0.00019641	0.00991616	IPS1
AT4G31940	36.9434	1.60769	0.497208	3.23344	0.00122309	0.0371556	CYP82C4
AT5G56080	1072.82	1.59574	0.188097	8.48359	2.18347e-17	2.59056e-14	NAS2
AT2G23170	329.899	1.56318	0.228651	6.83652	8.1141e-12	3.3324e-09	GH3.3
AT1G26380	169.138	1.55756	0.33705	4.62114	3.81641e-06	0.000397576	FOX1
AT5G49645	31.1843	1.55738	0.437857	3.55683	0.000375355	0.0161477	x
AT1G34510	104.942	1.54327	0.370683	4.16332	3.13657e-05	0.00235861	PER8
AT5G57540	212.816	1.53766	0.223502	6.87984	5.99219e-12	2.55938e-09	XTH13
AT5G06190	37.5034	1.52632	0.430236	3.54763	0.000388719	0.0165017	x
AT3G28500	22.7357	1.52331	0.485214	3.13946	0.00169258	0.0465431	RPP2C
AT4G13420	415.356	1.52132	0.42976	3.53992	0.000400243	0.016867	POT5
AT2G01010	131.089	1.50346	0.268094	5.60795	2.04737e-08	4.12488e-06	x

## Sheet: Downregulated genes in xal2-2
ID	baseMean	log2FoldChange	lfcSE	stat	pvalue	padj	Gen
AT1G55210	1778.82	-3.18595	0.14696	-21.6791	3.23028e-104	3.44929e-100	DIR20		31 genes
AT3G29250	4213.03	-1.88824	0.133797	-14.1128	3.16849e-45	2.25555e-41	SDR4
AT1G21670	231.008	-3.25613	0.239724	-13.5828	5.06226e-42	2.70274e-38	DPP6 amino-terminal domain protein
AT4G11880	6890.12	-3.48195	0.281181	-12.3833	3.2175e-35	1.14522e-31	AGL14
AT1G77690	1899.35	-1.60559	0.131411	-12.2181	2.4894e-34	7.59479e-31	LAX3
AT5G23840	550.948	-1.58641	0.15856	-10.0051	1.44729e-23	3.86353e-20	MD-2-related lipid recognition domain-containing protein;
AT3G04010	803.231	-1.6446	0.179579	-9.15809	5.28241e-20	8.05794e-17	O-Glycosyl hydrolases family 17 protein;(source:Araport11)
AT1G75945	42.2741	-9.50598	1.24954	-7.60757	2.79302e-14	1.92412e-11	x
AT4G33720	155.755	-3.05031	0.41134	-7.41554	1.21128e-13	7.51825e-11	x
AT4G04990	179.278	-2.06096	0.277794	-7.41902	1.17994e-13	7.51825e-11	x
AT5G62165	198.607	-1.55147	0.210756	-7.36147	1.81902e-13	1.02229e-10	AGL42
AT4G37700	167.85	-1.50231	0.205462	-7.31188	2.63432e-13	1.44253e-10	x
AT1G05650	223.842	-1.6527	0.228939	-7.21897	5.2381e-13	2.72841e-10	x
AT3G62740	184.915	-1.68298	0.250606	-6.71565	1.87233e-11	6.77721e-09	BGLU7
AT5G65080	33.6091	-3.66297	0.565044	-6.48262	9.01455e-11	2.87335e-08	MAF5
AT1G75620	110.395	-1.90661	0.323301	-5.89732	3.69459e-09	9.17461e-07	x
AT3G06020	20.1055	-7.56278	1.30676	-5.78743	7.14701e-09	1.55747e-06	FAF4
AT3G57670	28.0463	-3.59352	0.660666	-5.43924	5.35086e-08	9.52274e-06	WIP2
AT4G37950	47.5672	-2.16084	0.407372	-5.30433	1.13086e-07	1.81583e-05	x
AT5G42930	97.2296	-1.52196	0.295538	-5.14979	2.60785e-07	3.71289e-05	x
AT5G46050	134.998	-1.61065	0.336506	-4.78641	1.69793e-06	0.00020145	NPF5.2
AT3G15800	41.6518	-2.4475	0.531649	-4.6036	4.1524e-06	0.00042634	x
AT4G13310	39.9289	-2.14863	0.561562	-3.82617	0.000130151	0.00725719	CYP71A20
AT5G65070	39.8804	-1.58687	0.41769	-3.79917	0.000145183	0.00783983	MAF4
AT4G11020	43.4806	-1.65362	0.452738	-3.65249	0.000259705	0.0120833	x
AT5G33355	12.6199	-2.46201	0.730078	-3.37225	0.000745558	0.0262856	x
AT1G74810	23.2079	-2.05794	0.627016	-3.28212	0.00103031	0.0326748	BOR5
AT5G24220	19.3652	-2.33179	0.71798	-3.24771	0.00116338	0.0359035	x
AT1G22480	9.29047	-3.29961	1.0271	-3.21256	0.00131557	0.0388594	x
AT3G17130	26.1038	-1.89456	0.602082	-3.14669	0.00165132	0.04574	x
AT2G36710	11.1678	-4.45224	1.4314	-3.1104	0.00186835	0.0495659	PME15

## Sheet: Upregulated genes in xal2-2
ID	baseMean	log2FoldChange	lfcSE	stat	pvalue	padj	Gen
AT5G24240	725.853	4.15512	0.165783	25.0636	1.23979e-138	2.6477e-134	PI4KG3		69 genes
AT5G60250	70.2456	3.77433	0.411783	9.16584	4.91622e-20	8.05794e-17	x
AT5G56080	1072.82	1.59574	0.188097	8.48359	2.18347e-17	2.59056e-14	NAS2
AT4G05275	72.2134	10.1578	1.22028	8.32418	8.4918e-17	9.06755e-14	x
AT2G30750	824.478	1.87122	0.231308	8.08971	5.98053e-16	5.55305e-13	CYP71A12
AT3G60160	60.7923	3.13658	0.408493	7.67841	1.61081e-14	1.18622e-11	ABCC9
AT2G01020	131.122	1.72601	0.239884	7.19519	6.23716e-13	3.17145e-10	x
AT5G57540	212.816	1.53766	0.223502	6.87984	5.99219e-12	2.55938e-09	XTH13
AT2G23170	329.899	1.56318	0.228651	6.83652	8.1141e-12	3.3324e-09	GH3.3
AT5G47600	87.2655	2.16494	0.323549	6.69121	2.21326e-11	7.7486e-09	HSP14.7
AT2G20800	49.5909	2.75024	0.413636	6.64895	2.95193e-11	9.87182e-09	NDB4
AT2G31085	60.7445	2.21862	0.333696	6.64863	2.9584e-11	9.87182e-09	CLE6
AT3G05955	23.7939	6.09245	0.984064	6.19111	5.97431e-10	1.61503e-07	x
AT1G54970	308.81	1.79633	0.297673	6.03457	1.59386e-09	4.10102e-07	PRP1
AT3G28510	72.9322	2.34718	0.400872	5.85518	4.76488e-09	1.13065e-06	x
AT4G04223	23.1158	7.50741	1.29096	5.81535	6.05071e-09	1.37764e-06	x
AT3G05945	35.2955	2.91545	0.511135	5.70387	1.17116e-08	2.50114e-06	x
AT2G01010	131.089	1.50346	0.268094	5.60795	2.04737e-08	4.12488e-06	x
AT5G24280	131.541	1.66749	0.307657	5.41997	5.96094e-08	1.04346e-05	GMI1
AT4G28850	88.9928	2.1919	0.410682	5.33722	9.43829e-08	1.57472e-05	XTH26
AT2G06995	19.3443	6.61826	1.28101	5.16643	2.38613e-07	3.42001e-05	x
AT5G04230	19.5219	3.22769	0.654437	4.93201	8.1389e-07	0.000104707	PAL3
AT1G70260	45.1539	2.08355	0.42882	4.8588	1.18099e-06	0.000146636	x
AT5G09570	13.6535	6.29251	1.33077	4.72846	2.26226e-06	0.000254036	x
AT1G26380	169.138	1.55756	0.33705	4.62114	3.81641e-06	0.000397576	FOX1
AT4G26260	38.0135	2.62367	0.573792	4.57252	4.81894e-06	0.000483161	MIOX4
AT1G67150	112.665	1.70088	0.375639	4.52796	5.95547e-06	0.000578114	x
AT2G38490	43.378	1.61743	0.377495	4.28463	1.8304e-05	0.00149199	CIPK22
AT1G34510	104.942	1.54327	0.370683	4.16332	3.13657e-05	0.00235861	PER8
AT3G50710	26.2965	2.15502	0.52396	4.11296	3.90624e-05	0.00282785	x
AT5G05770	7.24341	5.93803	1.44887	4.0984	4.1601e-05	0.00297134	WOX7
AT2G04050	21.2311	3.01239	0.741857	4.06061	4.89451e-05	0.00343839	DTX3
AT1G71280	26.3101	2.23085	0.554385	4.024	5.7217e-05	0.00381964	RH55
AT2G31081	44.2365	2.32926	0.581875	4.00304	6.25347e-05	0.0041092	CLE4
AT1G11655	48.3195	1.78258	0.449284	3.9676	7.25998e-05	0.00457357	x
AT1G18830	10.0798	4.24083	1.12206	3.77952	0.000157128	0.00834732	SEC31A
AT5G52860	25.2737	2.63941	0.699483	3.77337	0.000161055	0.00849256	ABCG8
AT5G52390	30.6092	1.8549	0.492297	3.76784	0.000164663	0.00864015	x
AT5G05340	38.6063	1.64984	0.439179	3.75666	0.000172198	0.00892589	PER52
AT2G04190	21.9668	3.70852	0.992572	3.73628	0.000186766	0.00954202	x
AT3G09922	35.3894	1.61623	0.434052	3.72359	0.00019641	0.00991616	IPS1
AT2G04070	9.13159	3.56087	0.97179	3.66424	0.000248073	0.0117313	DTX4
AT3G07920	6.46369	5.2776	1.44555	3.65092	0.000261302	0.0121312	x
AT5G49645	31.1843	1.55738	0.437857	3.55683	0.000375355	0.0161477	x
AT5G53230	4.51195	6.16456	1.7379	3.54714	0.00038944	0.0165017	x
AT5G06190	37.5034	1.52632	0.430236	3.54763	0.000388719	0.0165017	x
AT4G13420	415.356	1.52132	0.42976	3.53992	0.000400243	0.016867	POT5
AT5G50915	4.96575	5.88304	1.66819	3.52661	0.000420915	0.0176161	BHLH137
AT3G47340	846.435	1.7267	0.489671	3.52623	0.000421513	0.0176161	ASN1
AT2G28850	13.4689	2.85764	0.814647	3.50783	0.000451785	0.018448	CYP710A3
AT2G30670	13.53	4.1653	1.19761	3.478	0.000505165	0.0199046	x
AT5G17960	39.028	1.71358	0.496128	3.45391	0.000552532	0.0213567	x
AT1G73000	9.02068	4.84324	1.4273	3.39329	0.000690574	0.0250389	PYL3
AT4G01830	21.7005	2.50984	0.741306	3.38571	0.000709949	0.0254391	ABCB5
AT1G66940	5.42633	6.22968	1.84724	3.37242	0.000745106	0.0262856	x
AT1G09080	15.8519	1.97954	0.590255	3.35371	0.000797362	0.0275096	MED37B
AT2G21450	12.5856	3.40941	1.01904	3.34572	0.000820704	0.0279824	CHR34
AT5G40990	19.3693	2.47297	0.74391	3.32429	0.000886446	0.0296723	GLIP1
AT4G37220	17.788	2.42536	0.729554	3.32445	0.000885947	0.0296723	x
AT1G75160	31.2982	2.04408	0.614858	3.32447	0.000885868	0.0296723	x
AT1G21520	16.1341	2.33713	0.70632	3.30888	0.000936692	0.0307754	x
AT2G24255	3.49531	5.74444	1.73833	3.30457	0.000951211	0.0310536	x
AT1G64480	26.8122	1.95359	0.594976	3.28348	0.00102535	0.0325855	CBL8
AT2G21210	21.7843	1.66072	0.512547	3.24013	0.00119475	0.0365758	x
AT4G31940	36.9434	1.60769	0.497208	3.23344	0.00122309	0.0371556	CYP82C4
AT5G24110	44.5837	1.74229	0.539208	3.2312	0.00123271	0.0373946	WRKY30
AT1G34440	20.6636	8.25842	2.57587	3.20607	0.00134561	0.0395279	x
AT5G65410	8.85793	4.6062	1.45401	3.16792	0.00153533	0.0435439	ZHD1
AT3G28500	22.7357	1.52331	0.485214	3.13946	0.00169258	0.0465431	RPP2C

## Sheet: Complete dataset
ID	baseMean	log2FoldChange	lfcSE	stat	pvalue	padj	Gene
AT5G24240	725.853	4.15512	0.165783	25.0636	1.23979e-138	2.6477e-134	PI4KG3
AT1G55210	1778.82	-3.18595	0.14696	-21.6791	3.23028e-104	3.44929e-100	DIR20
AT3G29250	4213.03	-1.88824	0.133797	-14.1128	3.16849e-45	2.25555e-41	SDR4
AT1G21670	231.008	-3.25613	0.239724	-13.5828	5.06226e-42	2.70274e-38	x
AT3G23510	1798.49	-1.32394	0.104394	-12.6822	7.42477e-37	3.17127e-33	x
AT4G11880	6890.12	-3.48195	0.281181	-12.3833	3.2175e-35	1.14522e-31	AGL14
AT1G77690	1899.35	-1.60559	0.131411	-12.2181	2.4894e-34	7.59479e-31	LAX3
AT5G23840	550.948	-1.58641	0.15856	-10.0051	1.44729e-23	3.86353e-20	x
AT2G28780	1905.83	1.13856	0.120737	9.43011	4.09672e-21	9.72106e-18	x
AT3G12670	1043.88	-1.20401	0.128278	-9.38598	6.23334e-21	1.33119e-17	emb2742
AT4G15910	3816.73	0.888109	0.095426	9.30678	1.31768e-20	2.55821e-17	ATDI21
AT2G01530	8134.77	-1.20159	0.129966	-9.24542	2.3431e-20	4.16994e-17	MLP329
AT5G60250	70.2456	3.77433	0.411783	9.16584	4.91622e-20	8.05794e-17	x
AT3G04010	803.231	-1.6446	0.179579	-9.15809	5.28241e-20	8.05794e-17	x
AT1G66800	559.729	-1.23373	0.136707	-9.02466	1.80256e-19	2.56636e-16	x
AT2G01520	16044.7	-1.29852	0.150423	-8.63246	6.00471e-18	8.01479e-15	MLP328
AT1G44800	5167.03	0.997353	0.11691	8.53096	1.45143e-17	1.82333e-14	x
AT5G56080	1072.82	1.59574	0.188097	8.48359	2.18347e-17	2.59056e-14	NAS2
AT3G56210	710.827	0.990272	0.117619	8.41932	3.78662e-17	4.25617e-14	x
AT4G05275	72.2134	10.1578	1.22028	8.32418	8.4918e-17	9.06755e-14	x
AT3G06355	1296.78	-1.04036	0.126638	-8.21523	2.11766e-16	2.15356e-13	x
AT3G45710	2710.31	-0.771015	0.0950869	-8.10853	5.12362e-16	4.97364e-13	NPF2.5
AT2G30750	824.478	1.87122	0.231308	8.08971	5.98053e-16	5.55305e-13	CYP71A12
AT2G39510	922.099	1.37188	0.169964	8.07162	6.93735e-16	6.17308e-13	x
AT2G01880	627.681	-1.00049	0.127054	-7.8745	3.42105e-15	2.9224e-12	PAP7
AT3G23810	9790.35	-0.979521	0.125019	-7.83496	4.68996e-15	3.85226e-12	SAHH2
AT1G50560	947.187	-0.868381	0.111876	-7.76197	8.36185e-15	6.61391e-12	CYP705A25
AT5G56760	2509.19	-0.738829	0.0960553	-7.6917	1.45188e-14	1.10737e-11	SAT5
AT3G60160	60.7923	3.13658	0.408493	7.67841	1.61081e-14	1.18622e-11	ABCC9
AT1G73330	12615.2	-1.1259	0.147686	-7.6236	2.46691e-14	1.75611e-11	ATDR4
AT1G75945	42.2741	-9.50598	1.24954	-7.60757	2.79302e-14	1.92412e-11	x
AT1G70850	27609.4	-1.04879	0.140858	-7.44573	9.64123e-14	6.43431e-11	MLP34
AT4G04990	179.278	-2.06096	0.277794	-7.41902	1.17994e-13	7.51825e-11	x
AT4G33720	155.755	-3.05031	0.41134	-7.41554	1.21128e-13	7.51825e-11	x
AT3G09260	339116	-0.717021	0.0967495	-7.4111	1.25254e-13	7.51825e-11	BGLU23
AT2G28960	1557.55	-0.809939	0.10931	-7.40954	1.26736e-13	7.51825e-11	x
AT3G44480	689.401	-1.18768	0.160993	-7.37724	1.61603e-13	9.32753e-11	RPP1
AT5G62165	198.607	-1.55147	0.210756	-7.36147	1.81902e-13	1.02229e-10	AGL42
AT4G37700	167.85	-1.50231	0.205462	-7.31188	2.63432e-13	1.44253e-10	x
AT5G59680	1119.83	-0.879534	0.120709	-7.28641	3.18324e-13	1.69953e-10	x
AT1G05650	223.842	-1.6527	0.228939	-7.21897	5.2381e-13	2.72841e-10	x
AT2G01020	131.122	1.72601	0.239884	7.19519	6.23716e-13	3.17145e-10	x
AT1G53940	495.979	-1.10866	0.154344	-7.183	6.81993e-13	3.38713e-10	GLIP2
AT1G22550	1087.92	-1.03047	0.143618	-7.17504	7.2287e-13	3.50855e-10	NPF5.16
AT1G21100	2865.05	-1.21735	0.172652	-7.05089	1.77782e-12	8.43712e-10	IGMT1
AT4G36880	372.084	1.16353	0.167792	6.93435	4.08097e-12	1.89463e-09	CP1
AT3G46440	3795.41	0.644732	0.0930191	6.93118	4.17346e-12	1.89635e-09	UXS5
AT5G44130	483.891	-1.02948	0.148745	-6.9211	4.48163e-12	1.99395e-09	FLA13
AT5G26280	25809.4	-0.722153	0.104747	-6.89426	5.41455e-12	2.35986e-09	x
AT5G57540	212.816	1.53766	0.223502	6.87984	5.99219e-12	2.55938e-09	XTH13
AT3G27060	1367.33	0.797261	0.116464	6.84555	7.61841e-12	3.19017e-09	TSO2
AT2G23170	329.899	1.56318	0.228651	6.83652	8.1141e-12	3.3324e-09	GH3.3
AT4G11320	17678.5	-0.911189	0.133343	-6.83343	8.29091e-12	3.34077e-09	RDL5
AT3G14410	618.837	0.9482	0.13884	6.82945	8.52428e-12	3.3712e-09	x
AT4G29740	886.377	-0.894113	0.132175	-6.76461	1.33665e-11	5.1901e-09	CKX4
AT4G12545	360.692	-1.4722	0.217837	-6.75826	1.39657e-11	5.26232e-09	AIR1B
AT3G59930	749.248	-1.2237	0.181089	-6.75744	1.40453e-11	5.26232e-09	x
AT3G16460	48634.3	-0.732784	0.108605	-6.74723	1.50694e-11	5.54867e-09	JAL34
AT3G62740	184.915	-1.68298	0.250606	-6.71565	1.87233e-11	6.77721e-09	BGLU7
AT2G16060	501.822	0.971382	0.14492	6.70289	2.04335e-11	7.27298e-09	AHB1
AT5G47600	87.2655	2.16494	0.323549	6.69121	2.21326e-11	7.7486e-09	HSP14.7
AT1G53830	1572.1	-0.83044	0.124758	-6.65639	2.80632e-11	9.66642e-09	PME2
AT2G20800	49.5909	2.75024	0.413636	6.64895	2.95193e-11	9.87182e-09	NDB4
AT2G31085	60.7445	2.21862	0.333696	6.64863	2.9584e-11	9.87182e-09	CLE6
AT5G48010	7775.49	-0.747683	0.113726	-6.57443	4.88397e-11	1.60465e-08	THAS1
AT1G49570	212.164	1.45265	0.222417	6.53122	6.52366e-11	2.1109e-08	PER10
AT5G65080	33.6091	-3.66297	0.565044	-6.48262	9.01455e-11	2.87335e-08	MAF5
AT3G15950	38207.1	-0.60713	0.0940991	-6.45203	1.10362e-10	3.466e-08	NAI2
AT3G16450	15675.4	-0.86672	0.135647	-6.38953	1.66393e-10	5.14999e-08	JAL33
AT2G41475	2480.18	-0.5628	0.0884394	-6.36369	1.96967e-10	6.00917e-08	ATS3A
AT3G52370	1409.71	-0.787582	0.12451	-6.32548	2.52448e-10	7.59334e-08	FLA15
AT5G35940	429.133	0.99672	0.158237	6.2989	2.99756e-10	8.77016e-08	JAL41
AT4G23420	785.251	-0.972045	0.15432	-6.29889	2.99785e-10	8.77016e-08	x
AT5G02170	249.55	-1.1942	0.189682	-6.29582	3.05788e-10	8.82488e-08	AVT1E
AT3G47780	2017.1	-0.82481	0.131488	-6.27291	3.54362e-10	1.00903e-07	ABCA7
AT5G47990	5389.64	-0.904053	0.144806	-6.24321	4.28677e-10	1.20458e-07	CYP705A5
AT4G28940	3212.91	-0.742949	0.119717	-6.20587	5.4394e-10	1.50862e-07	x
AT4G27860	3672.21	-0.547511	0.0883417	-6.19765	5.7312e-10	1.56917e-07	x
AT3G05955	23.7939	6.09245	0.984064	6.19111	5.97431e-10	1.61503e-07	x
AT3G16400	29155.3	-0.738191	0.119906	-6.1564	7.44153e-10	1.98652e-07	NSP1
AT3G59340	425.368	-1.25688	0.206847	-6.07636	1.22944e-09	3.24148e-07	x
AT3G01190	11294.5	-0.720912	0.118914	-6.06248	1.34041e-09	3.49095e-07	PER27
AT1G54970	308.81	1.79633	0.297673	6.03457	1.59386e-09	4.10102e-07	PRP1
AT5G38030	1619.98	-0.871994	0.144601	-6.03037	1.6359e-09	4.15907e-07	DTX30
AT4G33790	344.108	-1.11871	0.187441	-5.96831	2.39722e-09	6.02294e-07	FAR3
AT1G75620	110.395	-1.90661	0.323301	-5.89732	3.69459e-09	9.17461e-07	x
AT4G12510	1648.83	-0.719095	0.122331	-5.87828	4.14562e-09	1.01134e-06	x
AT1G17190	2545.92	-0.695512	0.118336	-5.87741	4.16737e-09	1.01134e-06	GSTU26
AT3G28345	7111.92	-0.604068	0.102881	-5.87153	4.31794e-09	1.03611e-06	ABCB15
AT3G28510	72.9322	2.34718	0.400872	5.85518	4.76488e-09	1.13065e-06	x
AT2G01890	1903.43	-0.736568	0.126287	-5.83251	5.45996e-09	1.28135e-06	PAP8
AT3G16690	507.986	-1.0471	0.179612	-5.82979	5.54978e-09	1.28827e-06	SWEET16
AT4G04223	23.1158	7.50741	1.29096	5.81535	6.05071e-09	1.37764e-06	x
AT3G57020	4959.09	-0.630115	0.10836	-5.81499	6.06379e-09	1.37764e-06	SSL9
AT4G00700	1155.74	-0.679231	0.117035	-5.80366	6.48845e-09	1.4586e-06	x
AT3G19710	3754.07	1.05645	0.182214	5.79786	6.71664e-09	1.49238e-06	BCAT4
AT4G21910	2253.89	-0.701861	0.121087	-5.79632	6.77848e-09	1.49238e-06	x
AT3G06020	20.1055	-7.56278	1.30676	-5.78743	7.14701e-09	1.55747e-06	FAF4
AT2G37130	16726.7	-0.954485	0.165765	-5.75805	8.50931e-09	1.8356e-06	PER21
AT3G05945	35.2955	2.91545	0.511135	5.70387	1.17116e-08	2.50114e-06	x
AT4G16260	11045.2	-0.581969	0.102275	-5.69023	1.26865e-08	2.68251e-06	x
AT1G30360	8858.62	-0.686351	0.120799	-5.68177	1.33304e-08	2.79102e-06	ERD4
AT1G36180	528.041	0.967651	0.17125	5.65053	1.59955e-08	3.31651e-06	ACC2
AT3G26830	444.747	1.04965	0.186622	5.62444	1.86112e-08	3.82173e-06	CYP71B15
AT1G72700	4537.18	-0.564681	0.100503	-5.61853	1.92593e-08	3.91716e-06	ALA5
AT2G01010	131.089	1.50346	0.268094	5.60795	2.04737e-08	4.12488e-06	x
AT1G52410	169.828	1.41926	0.253209	5.6051	2.08133e-08	4.15409e-06	TSA1
AT4G01430	567.232	1.00315	0.179131	5.60012	2.14205e-08	4.2357e-06	x
AT1G79270	2553.14	-0.849639	0.152045	-5.58806	2.29625e-08	4.49897e-06	ECT8
AT5G07220	3238.36	-0.555697	0.0995398	-5.58266	2.36865e-08	4.59864e-06	BAG3
AT1G78370	2200.29	1.13016	0.202815	5.57239	2.51269e-08	4.83432e-06	GSTU20
AT5G53370	1136.54	-0.887998	0.159515	-5.56687	2.59353e-08	4.94531e-06	ATPMEPCRF
AT1G62480	12236	0.534072	0.0960772	5.55878	2.7166e-08	5.13414e-06	x
AT1G59960	1485.61	0.545728	0.0994583	5.48701	4.08802e-08	7.65823e-06	x
AT5G48000	4211.84	-0.669598	0.122273	-5.47627	4.34376e-08	8.06655e-06	CYP708A2
AT4G11290	3175.46	-0.551945	0.100823	-5.47438	4.39057e-08	8.0832e-06	PER39
AT3G06390	1591.35	-0.712916	0.130667	-5.45597	4.8706e-08	8.8903e-06	x
AT4G33610	1831.03	-0.819232	0.150205	-5.45408	4.9227e-08	8.90926e-06	x
AT5G24780	544.034	-1.38263	0.253762	-5.44855	5.07808e-08	9.11324e-06	VSP1
AT3G57670	28.0463	-3.59352	0.660666	-5.43924	5.35086e-08	9.52274e-06	WIP2
AT2G34070	589.012	-0.7384	0.136163	-5.42291	5.86361e-08	1.0349e-05	TBL37
AT5G24280	131.541	1.66749	0.307657	5.41997	5.96094e-08	1.04346e-05	GMI1
AT1G56430	233.327	1.21451	0.224734	5.4042	6.50984e-08	1.13028e-05	NAS4
AT3G12500	2638.89	-0.613739	0.114292	-5.36992	7.87715e-08	1.35665e-05	CHI-B
AT4G02970	364.68	1.36021	0.254023	5.35467	8.57114e-08	1.46436e-05	AT7SL-1
AT4G25250	330.94	-1.28405	0.240268	-5.34425	9.07908e-08	1.53883e-05	PMEI4
AT2G29130	142.045	-1.46943	0.275187	-5.33977	9.30654e-08	1.56496e-05	LAC2
AT4G28850	88.9928	2.1919	0.410682	5.33722	9.43829e-08	1.57472e-05	XTH26
AT4G15390	12852.3	-0.494907	0.092838	-5.33087	9.77452e-08	1.61818e-05	x
AT4G31910	2212.19	0.78896	0.148487	5.31332	1.07647e-07	1.7684e-05	BAT1
AT1G44050	255.081	-1.1614	0.21871	-5.31024	1.09479e-07	1.78476e-05	x
AT4G06701	153.01	1.32234	0.249109	5.30828	1.10662e-07	1.79038e-05	x
AT4G37950	47.5672	-2.16084	0.407372	-5.30433	1.13086e-07	1.81583e-05	x
AT2G39530	1250.69	-0.741014	0.140389	-5.2783	1.30385e-07	2.07799e-05	x
AT1G72510	2557.94	-0.663498	0.125779	-5.2751	1.32685e-07	2.09897e-05	x
AT3G02020	911.69	0.994983	0.188885	5.26768	1.38161e-07	2.16458e-05	AK3
AT5G15230	4318.75	0.735716	0.139691	5.26675	1.38859e-07	2.16458e-05	GASA4
AT1G69530	1156.7	0.682971	0.129834	5.26035	1.43784e-07	2.2251e-05	ATEXPA1
AT1G51790	1378.72	-0.547713	0.104499	-5.2413	1.59445e-07	2.44972e-05	x
AT5G57630	1543.18	-0.705293	0.134912	-5.22781	1.71532e-07	2.6166e-05	CIPK21
AT3G07800	309.745	0.943599	0.181005	5.21311	1.85696e-07	2.81257e-05	TK1A
AT3G17712	110.223	-1.3586	0.260747	-5.21042	1.88415e-07	2.83365e-05	x
AT2G21640	92.0373	1.4739	0.283047	5.20725	1.91657e-07	2.86226e-05	x
AT1G62975	509.336	-1.10813	0.212891	-5.20515	1.93841e-07	2.87477e-05	BHLH125
AT5G06839	1045.17	-0.569724	0.10962	-5.19726	2.0225e-07	2.9788e-05	TGA10
AT4G31290	2150.69	0.515039	0.0992697	5.18828	2.1225e-07	3.10467e-05	GGCT22
AT5G10580	2418.51	0.711115	0.137135	5.18551	2.15424e-07	3.12965e-05	x
AT5G22800	372.118	0.94312	0.182471	5.16861	2.3584e-07	3.40311e-05	EMB86
AT2G06995	19.3443	6.61826	1.28101	5.16643	2.38613e-07	3.42001e-05	x
AT5G42930	97.2296	-1.52196	0.295538	-5.14979	2.60785e-07	3.71289e-05	x
AT5G57530	398.491	1.38605	0.269809	5.13717	2.78906e-07	3.94458e-05	XTH12
AT1G77760	4764.6	0.575238	0.112208	5.12652	2.9515e-07	4.14686e-05	NIA1
AT5G61820	7081.19	-0.472607	0.0923105	-5.11975	3.05937e-07	4.27033e-05	x
AT4G31650	162.402	1.07443	0.210722	5.09881	3.41789e-07	4.73977e-05	x
AT2G39310	9411.81	-0.618815	0.121437	-5.09579	3.47289e-07	4.78497e-05	JAL22
AT3G49960	1303.96	1.02767	0.201803	5.09245	3.53461e-07	4.83879e-05	PER35
AT1G02000	396.557	-0.719056	0.14266	-5.04034	4.64717e-07	6.32134e-05	GAE2
AT3G62040	4191.33	0.687931	0.13674	5.03094	4.88075e-07	6.59705e-05	x
AT5G49900	883.166	-0.621129	0.123994	-5.00935	5.46132e-07	7.33534e-05	x
AT3G58270	139.004	1.46718	0.29352	4.99855	5.77627e-07	7.70988e-05	x
AT4G14760	1485.48	-0.572553	0.114719	-4.99091	6.0097e-07	7.97162e-05	NET1B
AT5G03760	991.121	-0.79454	0.159939	-4.96778	6.77245e-07	8.92792e-05	CSLA9
AT1G27210	1158.65	-0.514287	0.103562	-4.96596	6.83615e-07	8.95661e-05	TOR1L4
AT2G22510	1622.01	-0.725258	0.146446	-4.95239	7.33083e-07	9.54441e-05	x
AT3G51330	3211.35	-0.551791	0.111445	-4.95124	7.37417e-07	9.54441e-05	x
AT5G04230	19.5219	3.22769	0.654437	4.93201	8.1389e-07	0.000104707	PAL3
AT3G08040	867.879	-0.603959	0.122637	-4.92478	8.44573e-07	0.000107718	DTX43
AT4G25070	944.539	-0.602346	0.122325	-4.92413	8.4738e-07	0.000107718	x
AT1G29025	1457.46	-0.694871	0.141529	-4.90975	9.1193e-07	0.000115238	x
AT5G52310	1032.03	-0.85805	0.174814	-4.90837	9.18379e-07	0.00011537	RD29A
AT1G55020	5551.83	-0.519378	0.106731	-4.86624	1.13742e-06	0.000142051	LOX1
AT1G70260	45.1539	2.08355	0.42882	4.8588	1.18099e-06	0.000146636	x
AT5G53900	677.512	0.726776	0.149843	4.85025	1.23309e-06	0.000152218	x
AT5G10625	314.089	0.866355	0.178933	4.84178	1.28683e-06	0.00015794	FLP2
AT1G05320	1524.88	-0.652105	0.135079	-4.82759	1.38196e-06	0.000168647	x
AT2G43570	1055.09	0.689749	0.143375	4.81081	1.5032e-06	0.0001824	CHI
AT1G19835	2528.02	-0.430964	0.0896826	-4.80544	1.54412e-06	0.000186306	FPP4
AT2G36380	14223.2	-0.515116	0.107367	-4.79773	1.60477e-06	0.000192537	ABCG34
AT2G22630	151.684	-1.17576	0.245309	-4.79296	1.64334e-06	0.000196063	AGL17
AT5G46050	134.998	-1.61065	0.336506	-4.78641	1.69793e-06	0.00020145	NPF5.2
AT3G13790	8365.02	-0.54305	0.113799	-4.77202	1.82385e-06	0.000214488	CWINV1
AT1G71695	453.53	0.697863	0.146254	4.77157	1.82791e-06	0.000214488	PER12
AT3G23090	1495.16	-0.562499	0.117932	-4.7697	1.84504e-06	0.000215315	x
AT1G01070	501.588	0.731661	0.15348	4.76713	1.86872e-06	0.000216893	x
AT4G23870	426.509	-0.79359	0.166615	-4.76302	1.90717e-06	0.00022016	x
AT5G67260	496.506	0.658173	0.138537	4.75089	2.02519e-06	0.000232527	CYCD32
AT5G26260	15353.4	-0.506147	0.106722	-4.74268	2.10907e-06	0.000240862	x
AT5G02240	958.301	0.614632	0.129973	4.72893	2.25701e-06	0.000254036	x
AT3G45730	287.143	1.04512	0.221007	4.72892	2.25717e-06	0.000254036	x
AT5G09570	13.6535	6.29251	1.33077	4.72846	2.26226e-06	0.000254036	x
AT3G01600	95.3722	1.23763	0.261789	4.72759	2.272e-06	0.000254036	anac044
AT5G55040	1478.05	-0.44838	0.0949658	-4.72148	2.34132e-06	0.000260423	x
AT2G19060	269.453	-1.01384	0.215568	-4.70312	2.56215e-06	0.000283509	x
AT5G15120	266.941	0.927119	0.197444	4.69561	2.65814e-06	0.000292614	PCO1
AT5G10470	1293.39	-0.551298	0.117515	-4.6913	2.71469e-06	0.000297015	KCA1
AT5G24290	1205.62	-0.549044	0.117055	-4.69046	2.72593e-06	0.000297015	MEB2
AT5G43400	1186.13	-0.506272	0.108019	-4.68688	2.77408e-06	0.000300727	x
AT5G24100	502.103	-0.757319	0.162305	-4.66603	3.07069e-06	0.0003312	x
AT3G50970	4407.98	-0.68126	0.146046	-4.6647	3.09064e-06	0.000331677	XERO2
AT1G16120	129.106	-1.18801	0.255062	-4.65773	3.1972e-06	0.000341396	WAKL1
AT5G07460	1232.6	-0.6216	0.133551	-4.6544	3.24933e-06	0.000345237	MRSA2
AT5G09530	6364.93	-0.663151	0.142785	-4.64441	3.41058e-06	0.000360576	PELPK1
AT1G09815	468.453	0.660778	0.142613	4.63336	3.59785e-06	0.000378501	POLD4
AT1G03870	4815.52	-0.579575	0.125227	-4.62818	3.68901e-06	0.000386189	FLA9
AT1G26380	169.138	1.55756	0.33705	4.62114	3.81641e-06	0.000397576	FOX1
AT1G64200	1956.9	-0.610023	0.132046	-4.61977	3.8417e-06	0.000398268	VHA-E3
AT1G20440	22234.6	-0.596577	0.129522	-4.606	4.10495e-06	0.000423504	COR47
AT3G15800	41.6518	-2.4475	0.531649	-4.6036	4.1524e-06	0.00042634	x
AT3G62250	8603.21	0.448492	0.0976639	4.5922	4.38595e-06	0.000448164	RPS27AC
AT1G62280	152.038	1.35913	0.296915	4.57752	4.70526e-06	0.000478503	SLAH1
AT4G13290	332.826	-0.791762	0.173012	-4.57634	4.73171e-06	0.000478912	CYP71A19
AT1G07560	813.294	-0.715748	0.156443	-4.57513	4.75934e-06	0.000479436	x
AT4G26260	38.0135	2.62367	0.573792	4.57252	4.81894e-06	0.000483161	MIOX4
AT1G48500	422.073	-0.627617	0.137475	-4.56533	4.98709e-06	0.000497683	TIFY6A
AT3G10630	214.37	1.21505	0.266219	4.56412	5.01592e-06	0.000498233	x
AT5G26290	2056.04	-0.639411	0.140266	-4.55855	5.15068e-06	0.00050925	x
AT2G40390	86.9311	-1.4243	0.313757	-4.5395	5.63867e-06	0.000554928	x
AT3G16430	4695.07	-0.513699	0.113313	-4.53343	5.80329e-06	0.00056851	PBP2
AT1G24050	1619.83	0.593789	0.131137	4.528	5.95448e-06	0.000578114	x
AT1G67150	112.665	1.70088	0.375639	4.52796	5.95547e-06	0.000578114	x
AT1G58440	1569.7	-0.458685	0.101342	-4.52609	6.00847e-06	0.00057934	SQE1
AT1G54030	4338.08	-0.379045	0.0837673	-4.52497	6.04034e-06	0.00057934	MVP1
AT3G61380	826.208	-0.519738	0.114868	-4.52465	6.04948e-06	0.00057934	x
AT2G01910	1438.42	-0.432631	0.0957347	-4.51906	6.21141e-06	0.000592191	MAP65-6
AT5G65380	3605.23	-0.605784	0.134191	-4.51435	6.35122e-06	0.00060283	DTX27
AT3G55290	118.761	-1.33405	0.296079	-4.50573	6.61437e-06	0.000625028	x
AT2G38870	1149.74	1.03221	0.229204	4.50343	6.68654e-06	0.000629065	x
AT2G15370	478.191	-0.819999	0.182193	-4.50072	6.77238e-06	0.000634346	FUT5
AT5G10180	721.111	1.05567	0.234931	4.49354	7.00487e-06	0.000653257	SULTR21
AT3G44200	1667.55	-0.48867	0.109024	-4.48224	7.38636e-06	0.00068584	NEK5
AT1G09090	1156.88	-0.538475	0.120276	-4.47701	7.56961e-06	0.000699813	RBOHB
AT2G34610	270.467	-0.86211	0.192886	-4.46953	7.83927e-06	0.000721618	x
AT1G78660	2541.15	-0.480887	0.107784	-4.4616	8.13514e-06	0.00074564	GGH1
AT4G21600	1570.76	-0.466228	0.104549	-4.4594	8.21888e-06	0.000750095	ENDO5
AT2G17500	5295.23	-0.493234	0.110702	-4.45549	8.37016e-06	0.000758769	PILS5
AT1G55990	1338.56	-0.758105	0.170165	-4.45511	8.38497e-06	0.000758769	x
AT2G43100	1417.42	0.811433	0.182272	4.45178	8.51629e-06	0.0007674	IPMI2
AT4G27710	410.309	-0.689432	0.154901	-4.45079	8.5556e-06	0.000767704	CYP709B3
AT5G28080	252.676	-0.827738	0.186123	-4.44727	8.6967e-06	0.000777099	WNK9
AT4G36640	1253.7	-0.537865	0.121317	-4.43356	9.26888e-06	0.000822848	x
AT2G18193	1081.23	0.764949	0.172551	4.43317	9.28574e-06	0.000822848	x
AT1G20700	145.444	0.983074	0.221869	4.43088	9.3851e-06	0.000828215	WOX14
AT4G15400	439.216	-0.692091	0.156311	-4.42766	9.52629e-06	0.000837216	BIA1
AT4G13770	3220.41	0.777509	0.17622	4.41214	1.02355e-05	0.00089586	CYP83A1
AT4G02390	288.756	0.883309	0.200259	4.41084	1.0297e-05	0.000897561	PARP2
AT4G16190	8875.46	-0.575274	0.130481	-4.40888	1.03905e-05	0.000902033	RD19C
AT5G09520	753.012	-0.710852	0.161557	-4.4	1.08249e-05	0.000935939	PELPK2
AT5G52790	783.287	-0.661649	0.150552	-4.39481	1.10869e-05	0.000954726	CBSDUF5
AT5G04120	179.533	1.03795	0.236233	4.39374	1.11415e-05	0.00095557	IPSP
AT2G29460	133.26	1.25117	0.285918	4.37596	1.20899e-05	0.00103277	GSTU4
AT1G19700	786.378	-0.549337	0.126003	-4.35973	1.30222e-05	0.00110456	BLH10
AT2G28790	1035.83	0.548524	0.125822	4.35954	1.30337e-05	0.00110456	x
AT2G26690	255.759	-1.13549	0.260876	-4.3526	1.34535e-05	0.00113562	NPF6.2
AT5G19040	555.596	-0.676734	0.155891	-4.34108	1.41785e-05	0.00119211	IPT5
AT1G80370	337.205	0.715138	0.165078	4.33212	1.47681e-05	0.00123681	CYCA2-4
AT1G72140	626.343	-0.676834	0.156426	-4.32686	1.51249e-05	0.00126175	NPF5.12
AT5G26660	537.045	-0.711019	0.164745	-4.31588	1.58968e-05	0.00132098	MYB86
AT2G40080	2282.59	-0.590499	0.136913	-4.31296	1.61084e-05	0.00133338	ELF4
AT5G48430	1415.82	-0.637813	0.147914	-4.31205	1.6175e-05	0.00133372	x
AT5G23010	1517.23	0.741203	0.172081	4.30729	1.65266e-05	0.00135747	MAM1
AT4G26320	1004.31	-0.57913	0.134519	-4.30519	1.6684e-05	0.00136515	AGP13
AT2G38490	43.378	1.61743	0.377495	4.28463	1.8304e-05	0.00149199	CIPK22
AT1G77120	1101.49	0.83526	0.195141	4.28028	1.86656e-05	0.00151568	ADH1
AT2G23540	3512.35	-0.491053	0.114791	-4.27779	1.88757e-05	0.00152693	x
AT2G22190	198.054	-0.977007	0.228502	-4.2757	1.90537e-05	0.00153551	TPPE
AT4G13530	981.607	-0.504596	0.118044	-4.27464	1.91445e-05	0.00153655	x
AT4G15393	1988.42	-0.593546	0.138878	-4.27387	1.92105e-05	0.00153655	CYP702A5
AT2G31083	91.9889	1.38459	0.324665	4.26469	2.00178e-05	0.00159515	CLE5
AT1G32450	7996.1	0.4555	0.107248	4.24717	2.16486e-05	0.00171869	NPF7.3
AT3G46700	2191.67	-0.64902	0.152908	-4.24451	2.19074e-05	0.00172984	UGT76E3
AT3G62460	350.563	0.732855	0.172684	4.2439	2.19671e-05	0.00172984	x
AT2G47460	358.091	-1.05519	0.248676	-4.24324	2.2032e-05	0.00172984	MYB12
AT2G43390	120.704	-1.02437	0.241706	-4.23807	2.2545e-05	0.00176363	x
AT1G21310	83164.6	-0.598806	0.141648	-4.22741	2.36398e-05	0.00184253	EXT3
AT2G37980	832.362	-0.664068	0.157169	-4.22519	2.38735e-05	0.00184903	OFUT19
AT4G32410	13570.9	-0.393836	0.093216	-4.22498	2.38965e-05	0.00184903	CESA1
AT1G64370	604.355	-0.757302	0.179409	-4.22109	2.43122e-05	0.00187036	x
AT5G07130	496.541	-0.734166	0.173941	-4.22077	2.43473e-05	0.00187036	LAC13
AT4G15290	556.161	-0.778058	0.184612	-4.21456	2.50263e-05	0.00191563	CSLB5
AT4G01140	344.294	-0.836569	0.199693	-4.18927	2.79857e-05	0.00213451	x
AT3G45650	1387.17	-0.628735	0.150229	-4.18518	2.84935e-05	0.0021655	NAXT1
AT4G39350	3688.86	-0.409762	0.0980003	-4.18123	2.89935e-05	0.00219569	CESA2
AT5G60020	571.529	-0.553604	0.132751	-4.17025	3.04268e-05	0.00229609	LAC17
AT1G34510	104.942	1.54327	0.370683	4.16332	3.13657e-05	0.00235861	PER8
AT4G35030	834.786	-0.683183	0.16416	-4.1617	3.1588e-05	0.002367	x
AT3G56240	3707.01	0.566134	0.136111	4.15935	3.19157e-05	0.00238319	CCH
AT1G26390	134.639	0.971153	0.233885	4.15226	3.29205e-05	0.00244965	FOX2
AT5G54960	2283.8	-0.47419	0.114321	-4.14788	3.35563e-05	0.00248829	PDC2
AT5G41790	2599.17	-0.506091	0.12222	-4.14081	3.46087e-05	0.00255745	CIP1
AT1G65960	4940.39	-0.37994	0.0918142	-4.13814	3.50131e-05	0.00257842	GAD2
AT1G54740	740.544	-0.658671	0.159213	-4.13705	3.51797e-05	0.00258178	x
AT5G40590	395.166	-0.66074	0.159773	-4.13549	3.54201e-05	0.00259052	x
AT3G32980	43133.4	-0.405986	0.0985644	-4.11899	3.8053e-05	0.00277358	PER32
AT3G01516	173.096	-1.17206	0.284712	-4.11664	3.84429e-05	0.00279247	x
AT3G50710	26.2965	2.15502	0.52396	4.11296	3.90624e-05	0.00282785	x
AT3G27960	1194.5	-0.413834	0.100698	-4.10967	3.96233e-05	0.00284948	KLCR2
AT2G20340	155.324	-0.829037	0.20173	-4.10964	3.9628e-05	0.00284948	ELI5
AT5G65980	508.994	0.997292	0.243189	4.1009	4.11552e-05	0.00294937	PILS7
AT5G05770	7.24341	5.93803	1.44887	4.0984	4.1601e-05	0.00297134	WOX7
AT5G52060	2368.65	-0.46035	0.112489	-4.09239	4.26956e-05	0.00303935	BAG1
AT3G21510	1822.08	-0.534594	0.131018	-4.08031	4.49766e-05	0.0031911	AHP1
AT1G52245	176.678	0.953026	0.234349	4.0667	4.76842e-05	0.00336387	x
AT4G13720	497.146	0.920653	0.2264	4.06649	4.77268e-05	0.00336387	x
AT2G04050	21.2311	3.01239	0.741857	4.06061	4.89451e-05	0.00343839	DTX3
AT1G51850	2086.61	-0.430289	0.105989	-4.05975	4.91256e-05	0.00343976	x
AT1G65370	151.401	0.960781	0.236881	4.05596	4.99292e-05	0.0034846	x
AT1G68238	111.206	1.25797	0.310359	4.05327	5.05059e-05	0.00351337	x
AT3G47050	81.1047	1.12049	0.276541	4.0518	5.08251e-05	0.0035241	x
AT1G54960	246.859	0.732988	0.180987	4.04995	5.12285e-05	0.00354057	ANP2
AT5G47550	348.987	0.621926	0.153617	4.04855	5.15354e-05	0.00354342	CYS5
AT5G11460	118.006	0.93802	0.23171	4.04825	5.16016e-05	0.00354342	FLZ10
AT4G23430	2167.23	-0.440339	0.108815	-4.04668	5.19491e-05	0.00355585	TIC32
AT3G16240	2045.59	0.6037	0.149241	4.04513	5.22933e-05	0.00356797	TIP2-1
AT3G11720	588.419	-0.501419	0.123988	-4.04408	5.25294e-05	0.00357267	x
AT3G54600	1616.63	0.716699	0.177438	4.03914	5.36468e-05	0.00363708	DJ1F
AT4G20260	8082.79	-0.584247	0.144692	-4.03787	5.39379e-05	0.00364525	PCAP1
AT5G19110	412.899	0.701442	0.173752	4.03702	5.41354e-05	0.00364705	x
AT1G02920	2759.79	0.687035	0.170253	4.03539	5.45118e-05	0.00366086	GSTF7
AT1G71280	26.3101	2.23085	0.554385	4.024	5.7217e-05	0.00381964	RH55
AT4G27030	132.879	-1.02382	0.254432	-4.02393	5.72338e-05	0.00381964	FAD4
AT5G16590	1770.71	-0.414722	0.103107	-4.02224	5.76471e-05	0.00383477	LRR1
AT5G11110	1220.52	-0.587371	0.146056	-4.02154	5.78197e-05	0.00383477	SPS2
AT1G78950	336.578	-0.692038	0.172372	-4.01478	5.95002e-05	0.00393401	x
AT1G70300	2243	-0.378586	0.0945241	-4.00518	6.19708e-05	0.00408472	POT6
AT2G31081	44.2365	2.32926	0.581875	4.00304	6.25347e-05	0.0041092	CLE4
AT1G77660	287.356	0.687816	0.171869	4.00197	6.28164e-05	0.00411505	x
AT1G13440	39150.9	0.423069	0.105808	3.99846	6.3755e-05	0.00416377	GAPC2
AT1G28130	2290.49	-0.486951	0.121865	-3.99582	6.44695e-05	0.00419759	GH3.17
AT5G18860	2959.35	-0.429142	0.107466	-3.99328	6.51666e-05	0.00422503	x
AT1G23080	1318.17	0.563376	0.141097	3.99284	6.52866e-05	0.00422503	PIN7
AT1G49470	439.561	0.69536	0.174225	3.99116	6.57518e-05	0.00424228	x
AT1G23720	14097.4	-0.731694	0.183375	-3.99016	6.60288e-05	0.00424732	x
AT3G23800	785.926	-0.508035	0.127361	-3.98894	6.637e-05	0.00425645	SBP3
AT3G19450	7193.78	-0.357134	0.0896891	-3.98191	6.83649e-05	0.00437126	CAD4
AT5G54370	2851.22	-0.726467	0.182555	-3.97944	6.90786e-05	0.00440371	x
AT1G21660	1554.39	-0.406251	0.102146	-3.97715	6.97472e-05	0.00442739	x
AT3G63010	911.11	-0.477996	0.120198	-3.97675	6.98646e-05	0.00442739	GID1B
AT3G02550	391.384	0.854821	0.215331	3.96979	7.19359e-05	0.00454515	LBD41
AT1G11655	48.3195	1.78258	0.449284	3.9676	7.25998e-05	0.00457357	x
AT5G12040	1043.78	0.454259	0.114636	3.96262	7.41312e-05	0.00465631	NLP3
AT5G57180	74.792	-1.41407	0.356979	-3.96123	7.45648e-05	0.00466981	CIA2
AT5G26310	533.269	-0.597176	0.150831	-3.95924	7.51871e-05	0.00469502	UGT72E3
AT5G64120	16489.3	-0.591416	0.149418	-3.95813	7.55379e-05	0.00470317	PER71
AT5G66950	1876.31	-0.364607	0.0922302	-3.95322	7.71056e-05	0.00478682	x
AT2G39980	165.62	1.21981	0.308713	3.95128	7.77334e-05	0.00481181	x
AT3G57860	250.652	0.731392	0.185339	3.94623	7.93908e-05	0.0049002	GIG1
AT3G14270	2816.12	-0.415549	0.10534	-3.94484	7.98522e-05	0.00490044	FAB1B
AT4G33120	334.605	-0.700375	0.177542	-3.94484	7.98535e-05	0.00490044	x
AT3G50640	479.652	0.561775	0.142516	3.94184	8.08588e-05	0.00494791	x
AT4G33070	1354.21	0.502689	0.127715	3.93602	8.28425e-05	0.00505481	PDC1
AT1G61210	823.062	-0.474616	0.120627	-3.93457	8.33445e-05	0.00507096	x
AT1G52720	797.821	0.552775	0.140577	3.93218	8.41792e-05	0.00510719	x
AT1G49500	866.444	-0.461931	0.11754	-3.92998	8.4952e-05	0.00513947	x
AT3G16470	3823.9	-0.418371	0.106557	-3.92625	8.62791e-05	0.00520287	JAL35
AT2G24720	204.198	0.921709	0.23479	3.92567	8.6487e-05	0.00520287	GLR2.2
AT1G53430	1692.8	-0.497284	0.12672	-3.92427	8.6994e-05	0.00521866	x
AT1G77520	834.951	-0.783287	0.199903	-3.91834	8.9161e-05	0.00533368	x
AT4G00900	1879.63	-0.401432	0.102504	-3.91626	8.99319e-05	0.00535887	ECA2
AT3G47380	116.018	1.26488	0.323016	3.91586	9.00841e-05	0.00535887	PMEI11
AT2G26570	1505.57	-0.45811	0.117027	-3.91457	9.05651e-05	0.00537252	WEB1
AT5G01990	485.77	-0.496359	0.126925	-3.91065	9.20493e-05	0.00544483	PILS6
AT3G28580	195.178	1.19694	0.306123	3.91001	9.22939e-05	0.00544483	x
AT1G15210	6191.83	-0.380574	0.097537	-3.90184	9.5463e-05	0.00561628	ABCG35
AT3G26440	2075.93	-0.438877	0.112568	-3.89876	9.66853e-05	0.00567256	x
AT2G38390	8692.88	-0.563785	0.144634	-3.898	9.69885e-05	0.00567475	PER23
AT4G01350	804.567	-0.506572	0.130018	-3.89617	9.77272e-05	0.00570236	x
AT1G26770	115.416	1.19192	0.307037	3.882	0.000103603	0.00602873	ATEXPA10
AT5G42590	1069.87	-0.643112	0.165725	-3.88059	0.000104202	0.00604713	CYP71A16
AT2G21045	6544.12	-0.442186	0.114018	-3.87822	0.000105223	0.00608979	HAC1
AT3G07470	1195.94	-0.524449	0.135344	-3.87492	0.000106658	0.00615621	x
AT1G14120	1356.69	-0.668065	0.173329	-3.85431	0.000116055	0.00668053	x
AT1G08990	953.762	-0.53682	0.139337	-3.85269	0.000116828	0.00669703	GUX5
AT5G60920	6737.09	-0.308913	0.0801872	-3.85239	0.000116969	0.00669703	COB
AT2G02100	4628.83	-0.605283	0.157517	-3.84265	0.000121713	0.00695001	PDF2.2
AT5G06330	561.878	-0.532777	0.138673	-3.84196	0.000122053	0.00695086	x
AT2G46340	1774.01	-0.541243	0.141008	-3.83839	0.000123844	0.00703409	SPA1
AT2G47890	1648.94	-0.469566	0.122452	-3.83469	0.000125721	0.00708696	COL13
AT5G20730	1767.92	-0.417345	0.10884	-3.83449	0.000125824	0.00708696	NPH4
AT1G14550	178.298	-1.179	0.307525	-3.83383	0.000126165	0.00708696	PER5
AT4G20820	568.661	-0.806391	0.21035	-3.83357	0.000126297	0.00708696	x
AT1G56010	1214.07	-0.49296	0.128609	-3.83302	0.000126578	0.00708696	NAC021
AT5G13210	158.878	0.822428	0.214584	3.83266	0.000126766	0.00708696	x
AT4G13310	39.9289	-2.14863	0.561562	-3.82617	0.000130151	0.00725719	CYP71A20
AT5G41700	4600.68	-0.431632	0.112859	-3.82453	0.00013102	0.00728662	UBC8
AT4G27430	1778.41	-0.388382	0.101612	-3.82219	0.000132273	0.0073372	CIP7
AT5G47950	889.412	-0.577707	0.151414	-3.81541	0.000135957	0.007522	x
AT5G06180	193.083	0.722371	0.189406	3.81387	0.000136806	0.00754943	x
AT2G38550	1163.73	0.418773	0.109874	3.8114	0.000138181	0.00758717	FAX3
AT2G15390	1060.26	-0.484165	0.127032	-3.81137	0.0001382	0.00758717	FUT4
AT1G06500	141.168	0.821833	0.215685	3.81034	0.000138777	0.00759926	x
AT5G56090	1161.56	-0.397171	0.104322	-3.80718	0.000140562	0.00767733	COX15
AT2G18400	616.075	0.604997	0.158995	3.80514	0.000141725	0.00772114	x
AT5G51550	947.43	0.643257	0.169101	3.80398	0.000142392	0.00773771	EXL3
AT4G23670	11039.4	-0.645245	0.169772	-3.80066	0.00014431	0.00782203	x
AT5G65070	39.8804	-1.58687	0.41769	-3.79917	0.000145183	0.00783983	MAF4
AT1G10090	1150.2	-0.553306	0.145651	-3.79884	0.000145372	0.00783983	x
AT1G05200	274.144	-0.720799	0.18984	-3.79686	0.000146538	0.00788277	GLR3.4
AT2G28990	649.019	-0.59671	0.157494	-3.78879	0.000151384	0.00812302	x
AT1G21380	2485.24	-0.395757	0.104593	-3.78378	0.000154462	0.00826449	TOL3
AT5G63410	823.066	-0.455244	0.120332	-3.78325	0.000154795	0.00826449	x
AT1G56680	670.582	0.499947	0.132272	3.77969	0.000157022	0.00834732	x
AT1G18830	10.0798	4.24083	1.12206	3.77952	0.000157128	0.00834732	SEC31A
AT3G59290	653.074	-0.457971	0.121209	-3.77838	0.000157854	0.00836511	EPSIN3
AT2G18860	425.911	-0.523012	0.138539	-3.7752	0.000159881	0.00845154	x
AT5G52860	25.2737	2.63941	0.699483	3.77337	0.000161055	0.00849256	ABCG8
AT5G04930	2212.16	-0.371051	0.0984445	-3.76914	0.000163811	0.00861663	ALA1
AT5G52390	30.6092	1.8549	0.492297	3.76784	0.000164663	0.00864015	x
AT1G04040	5560.52	-0.360337	0.0957472	-3.76342	0.000167608	0.00875952	x
AT1G21050	460.408	0.609075	0.161851	3.76319	0.000167758	0.00875952	x
AT4G35090	7029.13	-0.362591	0.0964184	-3.7606	0.000169507	0.00882924	CAT2
AT1G73300	96.3988	-1.02102	0.271768	-3.75697	0.000171986	0.00892589	SCPL2
AT5G05340	38.6063	1.64984	0.439179	3.75666	0.000172198	0.00892589	PER52
AT1G69040	1546.38	0.48538	0.129251	3.75533	0.000173112	0.00895153	ACR4
AT4G34138	1534.55	-0.575825	0.153419	-3.75328	0.000174537	0.0090034	UGT73B1
AT3G21720	804.049	0.664361	0.177152	3.75023	0.000176669	0.00909144	ICL
AT5G10210	332.742	0.802856	0.214237	3.74751	0.000178595	0.00916846	x
AT3G53510	1157.36	-0.51227	0.136742	-3.74625	0.000179497	0.00919267	ABCG20
AT2G04190	21.9668	3.70852	0.992572	3.73628	0.000186766	0.00954202	x
AT1G18590	910.083	0.664918	0.178101	3.73338	0.000188926	0.00962934	SOT17
AT1G01453	71.0598	1.45592	0.390041	3.73275	0.000189404	0.00963073	x
AT4G39880	845.38	0.403651	0.108217	3.73002	0.000191464	0.00971235	x
AT5G09620	1518	-0.401561	0.107808	-3.72477	0.000195491	0.00989314	x
AT3G09922	35.3894	1.61623	0.434052	3.72359	0.00019641	0.00991616	IPS1
AT3G24503	8716.44	-0.392233	0.105476	-3.71871	0.000200244	0.0100859	ALDH2C4
AT3G26300	555.146	-0.55789	0.150233	-3.71351	0.000204407	0.0102681	CYP71B34
AT1G17340	1260.05	-0.593305	0.159792	-3.71299	0.000204824	0.0102681	SAC5
AT3G22620	3998.03	-0.411447	0.110925	-3.70923	0.000207889	0.0103974	x
AT2G37440	346.067	-0.63366	0.170942	-3.70686	0.000209841	0.0104705	IP5P8
AT1G61080	131.392	1.33998	0.362074	3.70085	0.000214876	0.0106665	x
AT1G73310	269.874	-0.696336	0.188167	-3.70063	0.000215064	0.0106665	SCPL4
AT5G22410	443.146	0.911769	0.246421	3.70004	0.000215565	0.0106665	PER60
AT5G15320	1354.28	0.547937	0.148111	3.69951	0.000216018	0.0106665	x
AT1G51830	4101.76	-0.361469	0.0977151	-3.69922	0.000216267	0.0106665	x
AT2G20820	4004.82	0.549563	0.148593	3.69846	0.000216915	0.0106738	x
AT3G55150	650.304	-0.60171	0.16308	-3.68966	0.00022455	0.0110102	ATEXO70H1
AT4G40060	3732.63	-0.392043	0.106273	-3.68901	0.00022513	0.0110102	ATHB-16
AT1G70780	3630.15	-0.450349	0.122085	-3.68882	0.000225297	0.0110102	x
AT3G12977	366.78	-0.618911	0.16783	-3.68773	0.000226265	0.0110322	x
AT4G20110	3660.6	-0.421611	0.114403	-3.68531	0.000228423	0.0111121	VSR7
AT1G53910	4443.37	-0.354004	0.0961198	-3.68295	0.000230552	0.0111901	RAP2-12
AT1G77540	167.248	1.20573	0.327471	3.68195	0.000231458	0.0112086	x
AT1G15380	3175.65	0.440793	0.119755	3.68078	0.00023252	0.0112207	x
AT3G29630	249.052	-0.624371	0.169642	-3.68052	0.000232758	0.0112207	UGT79B4
AT5G20860	251.443	-0.704087	0.191466	-3.67735	0.00023567	0.0113355	x
AT3G55720	102.857	1.00602	0.273802	3.67425	0.000238553	0.0114435	x
AT1G21120	906.671	0.658689	0.179295	3.67378	0.000238987	0.0114435	x
AT1G06430	804.308	-0.486109	0.132377	-3.67215	0.000240515	0.0114909	FTSH8
AT5G24120	333.634	-1.03409	0.281787	-3.66976	0.000242775	0.011573	SIGE
AT4G20320	1613.28	0.386034	0.105348	3.66436	0.000247958	0.0117313	x
AT3G53230	1415.14	-0.434646	0.118617	-3.66429	0.000248024	0.0117313	CDC48D
AT2G04070	9.13159	3.56087	0.97179	3.66424	0.000248073	0.0117313	DTX4
AT5G58070	1904.59	-0.602439	0.164421	-3.66401	0.000248293	0.0117313	TIL
AT4G37410	1827	-0.676416	0.184825	-3.65977	0.000252445	0.0119011	CYP81F4
AT3G49780	942.102	-0.729196	0.199289	-3.659	0.000253206	0.0119107	PSK3
AT3G13760	553.734	-0.487321	0.133254	-3.65708	0.000255106	0.0119702	x
AT2G46750	2377.56	-0.511524	0.139894	-3.65651	0.000255677	0.0119702	GULLO2
AT2G43610	4060.09	0.568148	0.1554	3.65603	0.000256152	0.0119702	x
AT3G08670	642.421	-0.461654	0.126334	-3.65422	0.000257965	0.0120286	x
AT4G11020	43.4806	-1.65362	0.452738	-3.65249	0.000259705	0.0120833	x
AT3G07920	6.46369	5.2776	1.44555	3.65092	0.000261302	0.0121312	x
AT4G12730	3967.56	-0.445472	0.122053	-3.64982	0.000262423	0.0121568	FLA2
AT5G63270	153.903	1.1113	0.305001	3.64358	0.000268867	0.0124284	x
AT1G55390	107.12	-1.27156	0.349695	-3.63618	0.000276706	0.0127632	x
AT1G28260	360.537	-0.575329	0.158509	-3.62963	0.000283827	0.0130634	SMG7L
AT5G05170	14691	-0.310504	0.0856728	-3.6243	0.00028974	0.0133069	CESA3
AT3G02180	682.784	0.548664	0.151461	3.62248	0.000291792	0.0133659	SP1L3
AT3G14690	2859.77	-0.377128	0.104128	-3.62177	0.000292594	0.0133659	CYP72A15
AT1G66280	11822.8	-0.395406	0.109183	-3.6215	0.000292903	0.0133659	BGLU22
AT5G46730	156.207	1.27581	0.352585	3.61843	0.000296395	0.0134964	x
AT3G23570	770.826	0.579491	0.160375	3.61335	0.000302267	0.01371	x
AT3G15240	838.322	0.622199	0.172199	3.61326	0.000302369	0.01371	x
AT4G37320	803.491	-0.468414	0.129687	-3.61189	0.000303977	0.0137488	CYP81D5
AT3G01720	4161.61	-0.329531	0.0912466	-3.61143	0.000304513	0.0137488	SERGT1
AT5G10100	213.527	-1.2127	0.336146	-3.60767	0.000308962	0.0139202	TPPI
AT1G62330	814.015	-0.444235	0.123172	-3.60663	0.000310201	0.0139466	OFUT15
AT4G21230	443.927	-0.527528	0.146318	-3.60536	0.000311718	0.0139772	CRK27
AT3G56080	164.848	-0.92125	0.255554	-3.60491	0.000312263	0.0139772	x
AT2G19130	632.328	-0.53956	0.149697	-3.60435	0.000312936	0.0139772	x
AT5G11540	257.866	-0.62625	0.173771	-3.60388	0.000313498	0.0139772	GULLO3
AT3G14810	155.481	-1.01437	0.282175	-3.59484	0.000324585	0.0144413	MSL5
AT4G25790	314.861	1.03785	0.289629	3.58338	0.00033918	0.015055	x
AT1G07610	3847.44	0.714434	0.199401	3.58291	0.000339787	0.015055	MT1C
AT5G44480	2105.32	-0.382529	0.106815	-3.58122	0.000341995	0.0151158	DUR
AT4G27410	606.686	-0.675998	0.188785	-3.58078	0.000342576	0.0151158	RD26
AT4G04840	231.648	-1.19866	0.334853	-3.57967	0.000344028	0.0151486	MSRB6
AT4G39140	852.936	-0.424994	0.118755	-3.57876	0.000345234	0.0151704	x
AT4G27450	406.219	0.886286	0.247994	3.57381	0.000351822	0.0154282	x
AT1G77530	853.262	-0.70448	0.197301	-3.57058	0.000356194	0.0155879	x
AT1G67250	780.259	0.598873	0.167777	3.56946	0.000357717	0.0156225	x
AT5G54390	1503.39	0.418218	0.117216	3.56793	0.000359809	0.0156818	AHL
AT1G26410	82.5493	1.20911	0.338999	3.56671	0.000361498	0.0157233	FOX4
AT4G38080	5713.88	-0.495042	0.138902	-3.56397	0.000365283	0.0158476	x
AT1G11530	299.485	-0.723029	0.202894	-3.56357	0.00036584	0.0158476	CXXS1
AT5G55110	126.643	-0.819652	0.230194	-3.5607	0.000369868	0.0159897	x
AT4G02520	174.42	0.946486	0.266054	3.55749	0.000374415	0.0161477	GSTF2
AT5G49645	31.1843	1.55738	0.437857	3.55683	0.000375355	0.0161477	x
AT3G11780	2122.5	-0.386568	0.108704	-3.55616	0.000376313	0.0161477	x
AT2G16750	1350.97	-0.408351	0.114834	-3.556	0.000376548	0.0161477	x
AT5G22860	94.2321	-0.984866	0.277115	-3.554	0.000379423	0.0162384	x
AT3G14350	3236.93	-0.364678	0.10264	-3.55298	0.0003809	0.016269	SRF7
AT1G26945	100.516	1.17495	0.330828	3.55153	0.000382994	0.0163258	PRE6
AT5G06190	37.5034	1.52632	0.430236	3.54763	0.000388719	0.0165017	x
AT2G22770	1852.29	-0.501336	0.141325	-3.54739	0.000389067	0.0165017	NAI1
AT5G53230	4.51195	6.16456	1.7379	3.54714	0.00038944	0.0165017	x
AT1G01210	242.745	0.819943	0.23146	3.54248	0.000396389	0.0167629	x
AT4G13420	415.356	1.52132	0.42976	3.53992	0.000400243	0.016867	POT5
AT3G21190	1259	-0.474497	0.134046	-3.5398	0.000400428	0.016867	MSR1
AT5G19260	194.811	0.823777	0.233336	3.53044	0.000414874	0.017441	FAF3
AT1G27110	143.765	-0.900766	0.255225	-3.5293	0.000416659	0.0174816	x
AT5G50915	4.96575	5.88304	1.66819	3.52661	0.000420915	0.0176161	BHLH137
AT3G47340	846.435	1.7267	0.489671	3.52623	0.000421513	0.0176161	ASN1
AT2G26730	1760.26	-0.410673	0.116487	-3.52547	0.000422726	0.0176323	x
AT3G14940	16495.3	0.398425	0.113052	3.52425	0.000424678	0.0176792	PPC3
AT2G15970	4508.49	-0.55327	0.157049	-3.52292	0.000426815	0.017726	COR413PM1
AT2G39435	215.493	-0.69461	0.197191	-3.52252	0.000427463	0.017726	x
AT3G19320	56.7556	-1.15627	0.328745	-3.51722	0.000436097	0.0179758	x
AT5G42600	214.575	-1.13759	0.323463	-3.51692	0.000436579	0.0179758	MRN1
AT3G18370	1124.18	-0.434352	0.123507	-3.51682	0.000436747	0.0179758	SYTF
AT3G44300	5527.12	0.440238	0.125183	3.51676	0.000436853	0.0179758	NIT2
AT1G70230	513.256	-0.526236	0.149761	-3.51385	0.000441669	0.018139	AXY4
AT1G49860	4669.96	0.388243	0.11051	3.51318	0.000442771	0.0181494	GSTF14
AT5G48480	832.936	0.408554	0.1164	3.5099	0.00044827	0.0183396	x
AT2G28850	13.4689	2.85764	0.814647	3.50783	0.000451785	0.018448	CYP710A3
AT2G43050	387.549	-0.716355	0.204272	-3.50687	0.000453411	0.0184791	PME16
AT5G12420	2047.37	-0.425121	0.12126	-3.50586	0.000455134	0.0184905	x
AT3G20250	2587.33	-0.372239	0.106196	-3.5052	0.000456265	0.0184905	APUM5
AT3G18250	65.261	1.26352	0.36047	3.50519	0.000456287	0.0184905	x
AT2G30000	214.508	0.629888	0.179833	3.50262	0.000460702	0.018634	x
AT2G43620	104.146	1.26898	0.362636	3.49934	0.000466415	0.0187927	x
AT1G53570	1373.79	-0.398318	0.113827	-3.49932	0.000466452	0.0187927	MAPKKK3
AT4G32650	3537.62	-0.371168	0.106083	-3.49885	0.000467266	0.0187927	KAT3
AT2G23150	417.87	0.563456	0.161072	3.49816	0.000468488	0.0188064	NRAMP3
AT1G19900	908.938	-0.65837	0.188464	-3.49335	0.000476994	0.019112	x
AT2G40510	2774.45	0.435055	0.124586	3.49202	0.000479389	0.019172	RPS26B
AT2G47160	1654.16	0.325688	0.0933194	3.49003	0.000482966	0.0192789	BOR1
AT4G22000	839.168	0.589309	0.168929	3.4885	0.000485747	0.0193537	x
AT1G20816	77.0678	1.03641	0.297163	3.48768	0.000487223	0.0193747	OEP21A
AT1G18640	589.365	0.472348	0.135451	3.48721	0.000488087	0.0193747	PSP
AT3G23530	2304.57	-0.462808	0.132844	-3.48383	0.000494287	0.0195518	x
AT5G61250	489.435	-0.618978	0.177674	-3.48378	0.00049438	0.0195518	AtGUS1
AT1G28110	920.637	0.369058	0.105998	3.48175	0.000498151	0.0196645	SCPL45
AT2G30670	13.53	4.1653	1.19761	3.478	0.000505165	0.0199046	x
AT3G19340	1202.89	-0.392543	0.112891	-3.47717	0.000506737	0.0199298	x
AT1G69450	2932.73	-0.352807	0.101591	-3.47283	0.00051501	0.0201936	x
AT1G01650	772.402	-0.389662	0.112223	-3.4722	0.000516211	0.0201936	SPPL4
AT3G45390	87.9843	-0.997807	0.287373	-3.47216	0.000516282	0.0201936	LECRK12
AT3G60330	1373.97	0.702909	0.202726	3.46728	0.000525761	0.0205268	AHA7
AT3G59650	442.015	0.579094	0.167219	3.46307	0.000534041	0.020812	x
AT3G27390	1789.11	-0.412709	0.119253	-3.46078	0.000538619	0.0209522	x
AT3G08770	148.169	1.03836	0.300511	3.45533	0.000549621	0.0213329	LTP6
AT5G54510	802.155	0.668975	0.193628	3.45494	0.000550405	0.0213329	GH3.6
AT5G17960	39.028	1.71358	0.496128	3.45391	0.000552532	0.0213567	x
AT2G43160	5467.12	-0.338398	0.0979821	-3.45367	0.000553018	0.0213567	EPSIN2
AT4G23450	222.726	-0.676645	0.195994	-3.45238	0.000555667	0.0214114	AIRP1
AT3G56290	119.893	-1.28587	0.3725	-3.452	0.00055644	0.0214114	x
AT5G50010	341.148	-0.69203	0.200564	-3.45041	0.000559728	0.0214992	BHLH145
AT2G16365	851.313	-0.47961	0.139088	-3.44825	0.000564238	0.0216335	x
AT3G60280	195.695	0.908263	0.263706	3.44423	0.000572683	0.0218816	UCC3
AT4G36430	1129.1	0.453772	0.13175	3.4442	0.000572759	0.0218816	PER49
AT2G22920	648.021	-0.443752	0.128878	-3.44321	0.000574858	0.0219226	SCPL12
AT1G61050	509.804	-0.524559	0.152398	-3.44204	0.000577347	0.0219783	x
AT3G01790	1056.47	0.367172	0.106702	3.44111	0.000579333	0.0220147	x
AT2G16780	768.039	0.4909	0.142707	3.43992	0.000581894	0.0220727	MSI2
AT1G67870	875.721	-0.551284	0.160373	-3.43752	0.000587072	0.0222296	x
AT4G08160	435.283	-0.539526	0.156981	-3.43689	0.000588444	0.0222421	XYN3
ATMG00020	4399.78	-0.610463	0.177698	-3.43539	0.000591698	0.0223027	RRN26
AT5G26270	254.284	0.696849	0.202856	3.43519	0.000592134	0.0223027	x
AT3G60490	104.905	0.869464	0.253177	3.43421	0.000594277	0.022344	ERF035
AT1G51800	2099.19	-0.403184	0.117426	-3.43352	0.000595806	0.0223621	IOS1
AT5G19890	400.504	-0.854813	0.249106	-3.43152	0.000600202	0.0224876	PER59
AT3G24420	596.839	-0.480569	0.140076	-3.43076	0.000601892	0.0225017	x
AT4G22110	227.129	-0.632118	0.184286	-3.4301	0.000603364	0.0225017	x
AT1G43910	335.342	0.54655	0.159347	3.42993	0.00060374	0.0225017	x
AT1G74590	476.489	0.509973	0.148751	3.42836	0.000607243	0.0225928	GSTU10
AT2G29530	1015.17	0.476952	0.139385	3.42183	0.000622021	0.0231024	TIM10
AT1G09932	360.599	0.923338	0.270096	3.41856	0.000629533	0.0233361	x
AT3G59600	569.305	0.461645	0.135057	3.41814	0.000630499	0.0233361	NRPB8B
AT3G60520	143.951	-0.773178	0.226312	-3.41643	0.000634486	0.0234431	x
AT1G20190	551.673	0.617971	0.181043	3.4134	0.000641588	0.0236174	EXPA11
AT5G40890	4113.38	-0.442072	0.129514	-3.41332	0.000641759	0.0236174	CLC-A
AT1G72125	318.143	-0.5907	0.173074	-3.413	0.000642522	0.0236174	NPF5.13
AT5G58770	129.704	-0.83166	0.243766	-3.41172	0.000645548	0.0236878	x
AT3G45410	730.014	-0.518807	0.152119	-3.41054	0.000648336	0.0237493	LECRK13
AT1G26240	96.9948	1.18593	0.348181	3.40607	0.000659052	0.0241005	x
AT1G06770	203.66	-0.654592	0.192274	-3.40448	0.000662898	0.0241997	DRIP1
AT3G53730	1358.18	0.451683	0.132721	3.40326	0.000665878	0.024267	x
AT2G40250	46.5333	-1.40734	0.414036	-3.39907	0.000676151	0.0245995	x
AT1G63010	2317.29	-0.330655	0.0973647	-3.39605	0.000683659	0.0248303	x
AT1G73000	9.02068	4.84324	1.4273	3.39329	0.000690574	0.0250389	PYL3
AT4G01680	262.664	-0.732913	0.21604	-3.39248	0.000692625	0.0250482	MYB55
AT2G02390	4578.91	-0.291899	0.0860638	-3.39166	0.000694704	0.0250482	ATGSTZ1
AT5G64740	8255	-0.318231	0.0938358	-3.39136	0.000695475	0.0250482	CESA6
AT2G26510	1706.77	-0.409974	0.120889	-3.39134	0.000695522	0.0250482	NAT3
AT3G56490	1430.15	0.560065	0.165224	3.38972	0.000699639	0.025154	HINT1
AT3G14850	184.949	-0.730439	0.215646	-3.38721	0.000706073	0.0253427	TBL41
AT4G01830	21.7005	2.50984	0.741306	3.38571	0.000709949	0.0254391	ABCB5
AT3G07490	60.5924	1.38909	0.410412	3.38462	0.000712772	0.0254828	CML3
AT5G63600	17797.8	-0.361683	0.10687	-3.38432	0.000713557	0.0254828	FLS5
AT3G27170	1724.27	-0.477654	0.141195	-3.38293	0.000717159	0.0255687	CLC-B
AT2G31020	1375.86	-0.396669	0.117318	-3.38115	0.000721835	0.0256654	ORP1A
AT3G45030	2276.38	0.432654	0.127967	3.38098	0.000722274	0.0256654	RPS20C
AT3G24480	2536.48	-0.537251	0.158937	-3.38028	0.000724123	0.0256883	LRX4
AT5G26820	401.479	-0.477756	0.141631	-3.37324	0.000742879	0.0262856	IREG3
AT1G66940	5.42633	6.22968	1.84724	3.37242	0.000745106	0.0262856	x
AT5G33355	12.6199	-2.46201	0.730078	-3.37225	0.000745558	0.0262856	x
AT1G01050	1460.73	0.355986	0.105567	3.37213	0.000745883	0.0262856	PPA1
AT3G07568	637.297	0.513449	0.152289	3.37153	0.000747507	0.0262994	x
AT5G48720	386.337	0.560302	0.166375	3.36771	0.000757956	0.0266144	XRI1
AT1G13930	15389.2	-0.558578	0.165894	-3.36708	0.000759675	0.0266144	x
AT3G58710	545.032	-0.526525	0.156383	-3.36689	0.000760197	0.0266144	WRKY69
AT5G45775	3827.7	0.427055	0.126889	3.36558	0.000763833	0.0266558	RPL11C
AT4G03260	2550.42	-0.275816	0.0819523	-3.36556	0.000763877	0.0266558	x
AT5G43630	1071.01	-0.552359	0.164236	-3.36319	0.000770466	0.0268031	TZP
AT4G02350	1517.11	-0.346023	0.102887	-3.36314	0.000770608	0.0268031	SEC15B
AT2G44380	1611.94	-0.443486	0.131904	-3.3622	0.000773252	0.0268513	x
AT4G33000	49.773	1.20478	0.358647	3.35923	0.000781613	0.0270976	CBL10
AT1G70440	42.2388	1.41593	0.421656	3.35803	0.000784987	0.0271705	SRO3
AT2G45910	1096.17	-0.391641	0.116734	-3.35498	0.000793693	0.0274274	PUB33
AT1G09080	15.8519	1.97954	0.590255	3.35371	0.000797362	0.0275096	MED37B
AT4G09320	6493.82	0.437139	0.130442	3.35122	0.00080457	0.0277135	NDK1
AT4G28040	626.738	-0.69044	0.20609	-3.35018	0.000807586	0.0277726	x
AT2G41870	146.635	-0.706075	0.210893	-3.34802	0.000813905	0.0279449	REM4.2
AT3G56070	1975.83	0.400132	0.119586	3.34597	0.000819964	0.0279824	CYP19-3
AT5G14200	6873.58	0.506726	0.151452	3.34578	0.000820514	0.0279824	IMDH3
AT5G20700	12626.5	-0.425654	0.127222	-3.34576	0.000820581	0.0279824	FLZ14
AT2G21450	12.5856	3.40941	1.01904	3.34572	0.000820704	0.0279824	CHR34
AT3G27220	486.016	0.521329	0.155833	3.34543	0.000821549	0.0279824	x
AT4G28310	252.361	0.596949	0.178508	3.34411	0.000825473	0.0280713	x
AT1G06780	1208.55	-0.340053	0.101736	-3.34249	0.000830295	0.0281904	GAUT6
AT4G01700	722.71	0.511211	0.153379	3.33299	0.000859181	0.0291178	x
AT5G41765	85.6859	0.988838	0.296715	3.33262	0.000860336	0.0291178	x
AT5G12140	3406.42	0.515335	0.154709	3.331	0.000865348	0.0292107	CYS1
AT1G21440	1800.9	0.484933	0.14561	3.33036	0.000867343	0.0292107	x
AT4G38680	4392.77	0.449215	0.134887	3.3303	0.000867522	0.0292107	CSP2
AT5G53120	1162.66	0.328276	0.0985824	3.32997	0.000868552	0.0292107	SPDS3
AT1G75160	31.2982	2.04408	0.614858	3.32447	0.000885868	0.0296723	x
AT4G37220	17.788	2.42536	0.729554	3.32445	0.000885947	0.0296723	x
AT5G40990	19.3693	2.47297	0.74391	3.32429	0.000886446	0.0296723	GLIP1
AT5G01040	3090.86	-0.5497	0.165385	-3.32376	0.000888122	0.0296819	LAC8
AT4G12550	268.649	-1.08568	0.326747	-3.3227	0.000891494	0.0297481	AIR1
AT5G04960	2016.2	0.708909	0.213464	3.32097	0.000897041	0.0298864	PME46
AT2G47690	1360.95	0.502404	0.151304	3.32049	0.000898598	0.0298917	x
AT1G19130	613.555	0.42772	0.128898	3.31828	0.000905738	0.0300823	x
AT2G21290	551.486	0.558353	0.168335	3.31692	0.000910171	0.0301826	x
AT1G51890	873.051	-0.54029	0.163147	-3.31167	0.000927412	0.0307067	x
AT1G54890	506.975	0.626267	0.189151	3.31094	0.000929819	0.0307387	x
AT1G71170	497.791	0.572337	0.172914	3.30994	0.000933145	0.0307652	x
AT4G29410	3156.94	0.331247	0.100083	3.30972	0.000933886	0.0307652	RPL28C
AT1G47395	38.9508	1.40263	0.423831	3.30941	0.000934942	0.0307652	x
AT1G21520	16.1341	2.33713	0.70632	3.30888	0.000936692	0.0307754	x
AT5G47930	4300.22	0.402303	0.121626	3.3077	0.000940659	0.0308582	RPS27D
AT2G35860	137.58	-0.9664	0.292357	-3.30555	0.000947914	0.0310485	FLA16
AT1G78260	762.957	-0.566307	0.171367	-3.30465	0.000950957	0.0310536	x
AT2G24255	3.49531	5.74444	1.73833	3.30457	0.000951211	0.0310536	x
AT1G64590	521.27	-0.632948	0.191558	-3.30421	0.000952431	0.0310536	x
AT2G01940	60.5896	1.20586	0.365196	3.30195	0.000960139	0.0312534	SGR5
AT1G10480	214.68	-0.745564	0.225851	-3.30113	0.000962958	0.0312534	ZFP5
AT5G60760	1254.82	-0.615154	0.18636	-3.30089	0.00096377	0.0312534	x
AT4G22080	330.179	0.903994	0.273879	3.30071	0.000964414	0.0312534	RHS14
AT2G22330	2677.39	-0.411804	0.124787	-3.30005	0.000966673	0.0312792	CYP79B3
AT3G03270	878.329	0.564081	0.170954	3.2996	0.000968237	0.0312824	x
AT3G14680	2443.51	-0.424963	0.128901	-3.29682	0.00097786	0.0315218	CYP72A14
AT5G38200	1262.28	0.443334	0.134482	3.29661	0.0009786	0.0315218	x
AT3G29770	279.985	0.536893	0.162969	3.29444	0.000986171	0.0317179	MES11
AT5G02890	187.424	-0.602757	0.183016	-3.29345	0.000989642	0.0317545	x
AT1G74020	2299.48	-0.361861	0.109879	-3.29327	0.000990284	0.0317545	SSL12
AT1G07550	274.86	-0.594431	0.180558	-3.2922	0.000994081	0.0318285	x
AT4G22960	43.2286	1.32453	0.402457	3.2911	0.000997963	0.0319049	x
AT2G22970	1680.65	-0.403177	0.122542	-3.29011	0.00100147	0.0319661	SCPL11
AT3G17510	1237.95	-0.595045	0.18088	-3.28972	0.00100287	0.0319661	CIPK1
AT3G45700	437.2	-0.671612	0.204377	-3.28614	0.00101572	0.0323273	NPF2.4
AT1G64480	26.8122	1.95359	0.594976	3.28348	0.00102535	0.0325855	CBL8
AT1G74810	23.2079	-2.05794	0.627016	-3.28212	0.00103031	0.0326748	BOR5
AT1G18870	135.817	1.03453	0.315227	3.28187	0.00103123	0.0326748	ICS2
AT2G34350	99.4231	-0.927823	0.282847	-3.2803	0.00103698	0.0328086	x
AT1G31710	1281.55	-0.481419	0.146838	-3.27857	0.00104336	0.0329615	x
AT5G03520	2012.66	-0.292641	0.0893471	-3.27532	0.00105541	0.033293	RABE1D
AT5G43690	158.672	-0.804035	0.245654	-3.27304	0.00106399	0.0334953	SOT1
AT3G42725	42.2031	1.3734	0.419643	3.27278	0.00106496	0.0334953	x
AT3G25655	90.0971	-1.25208	0.382873	-3.27023	0.0010746	0.0337488	IDL1
AT1G79860	60.3645	1.47185	0.450311	3.26852	0.00108112	0.0339037	ROPGEF12
AT2G32390	367.377	-0.554291	0.169834	-3.26372	0.0010996	0.0344325	GLR3.5
AT2G20080	228.57	-0.725262	0.222297	-3.26258	0.00110404	0.0345164	SPEAR1
AT5G15200	12244.8	0.422907	0.129638	3.2622	0.00110551	0.0345164	RPS9B
AT5G42250	1209	-0.455449	0.139994	-3.25334	0.00114057	0.035526	x
AT1G49660	1385.93	-0.464561	0.142833	-3.25248	0.00114404	0.035526	CXE5
AT5G57655	4361.9	-0.436496	0.134208	-3.2524	0.00114437	0.035526	XYLA
AT4G01450	1460.7	0.386561	0.118856	3.25234	0.00114458	0.035526	x
AT5G20830	1195.99	0.461184	0.14184	3.25143	0.00114827	0.035526	SUS1
AT5G24580	391.301	0.509337	0.156654	3.25135	0.00114858	0.035526	HIPP09
AT3G56000	189.673	-0.772714	0.237676	-3.25113	0.00114949	0.035526	CSLA14
AT5G24220	19.3652	-2.33179	0.71798	-3.24771	0.00116338	0.0359035	x
AT3G27490	47.9148	-1.35527	0.417571	-3.24561	0.00117201	0.0361174	x
AT1G77710	1088.26	0.574006	0.17695	3.24389	0.00117911	0.0362737	x
AT5G14800	3034.55	0.285134	0.0879079	3.24356	0.00118047	0.0362737	PROC1
AT5G54230	295.05	-0.645697	0.199206	-3.24136	0.00118962	0.0365023	MYB49
AT2G21210	21.7843	1.66072	0.512547	3.24013	0.00119475	0.0365758	x
AT4G33330	170.158	-0.734104	0.226578	-3.23996	0.00119545	0.0365758	PGSIP3
AT2G22010	1374.87	-0.323944	0.0999983	-3.23949	0.00119742	0.0365839	RKP
AT4G34881	247.501	-0.699679	0.216066	-3.23826	0.00120261	0.0366899	x
AT1G29350	1348.02	-0.37974	0.11741	-3.23431	0.00121936	0.0371063	x
AT5G27700	3393.37	0.392061	0.121223	3.23422	0.00121973	0.0371063	RPS21C
AT4G31940	36.9434	1.60769	0.497208	3.23344	0.00122309	0.0371556	CYP82C4
AT5G24110	44.5837	1.74229	0.539208	3.2312	0.00123271	0.0373946	WRKY30
AT5G60360	11921.3	-0.313952	0.0972307	-3.22894	0.0012425	0.0376326	AALP
AT3G61260	2577.18	-0.384066	0.118963	-3.22844	0.00124466	0.0376326	x
AT2G19750	1378.38	0.451141	0.139751	3.22817	0.00124585	0.0376326	RPS30A
AT3G60130	1595.75	-0.489924	0.151789	-3.22767	0.00124802	0.0376451	BGLU16
AT1G66700	167.921	0.793468	0.245895	3.22686	0.00125156	0.0376985	PXMT1
AT1G01610	1881.07	-0.44405	0.137642	-3.22612	0.00125482	0.0377434	GPAT4
AT2G40765	1090.21	0.68749	0.213288	3.22329	0.00126728	0.0380648	x
AT5G56980	1092.63	-0.491871	0.152764	-3.2198	0.00128279	0.0384766	A70
AT4G37310	562.442	-0.475855	0.147827	-3.219	0.00128641	0.0385309	CYP81H1
AT3G16350	583.594	-0.499215	0.155143	-3.21778	0.00129185	0.0386397	x
AT1G78600	1046.67	-0.517446	0.160851	-3.21692	0.00129574	0.0387018	LZF1
AT1G30760	823.054	0.445084	0.1384	3.21592	0.00130027	0.0387069	x
AT1G60650	408.746	0.46292	0.143955	3.21572	0.00130118	0.0387069	RZ1B
AT5G05250	220.739	0.708796	0.220428	3.21554	0.00130199	0.0387069	x
AT4G30490	780.921	-0.442193	0.137529	-3.21528	0.00130316	0.0387069	x
AT1G78860	577.424	-0.514053	0.159917	-3.2145	0.00130673	0.0387468	x
AT4G18760	430.686	-0.535515	0.16661	-3.21419	0.00130813	0.0387468	RLP51
AT3G50840	183.241	-0.596926	0.18576	-3.21343	0.00131159	0.0387955	x
AT1G22480	9.29047	-3.29961	1.0271	-3.21256	0.00131557	0.0388594	x
AT1G34670	489.248	-0.460971	0.143569	-3.21079	0.00132369	0.0390451	AtMYB93
AT4G33150	2404.16	-0.503744	0.156944	-3.20971	0.00132869	0.0391385	x
AT3G10860	3296.19	0.637905	0.19878	3.20909	0.00133155	0.0391687	x
AT1G34440	20.6636	8.25842	2.57587	3.20607	0.00134561	0.0395279	x
AT5G40450	9722.53	-0.394546	0.123239	-3.20147	0.0013673	0.04011	x
AT3G16420	53900.1	-0.41555	0.129847	-3.2003	0.00137285	0.0402176	PBP1
AT1G15270	1942.15	0.468694	0.146523	3.19877	0.00138013	0.0403756	x
AT4G03020	2164.5	-0.311663	0.0975189	-3.19593	0.00139383	0.0407204	x
AT5G48030	955.686	0.378162	0.11837	3.19475	0.00139954	0.0408133	GFA2
AT4G25090	2166	-0.314106	0.0983278	-3.19448	0.00140083	0.0408133	RBOHG
AT4G26620	626.674	0.394044	0.123472	3.19136	0.00141605	0.0412004	x
AT1G68050	343.414	-0.637466	0.199794	-3.19061	0.00141973	0.0412514	ADO3
AT1G11080	1434.67	0.606965	0.190339	3.18886	0.00142836	0.0414459	scpl31
AT3G56220	155.931	0.650046	0.203915	3.18783	0.00143347	0.0414629	x
AT1G76240	857.936	-0.65393	0.205136	-3.18778	0.00143368	0.0414629	x
AT2G25210	1111.21	0.646162	0.202714	3.18756	0.00143478	0.0414629	x
AT1G16720	604.012	-0.428209	0.134455	-3.18477	0.00144868	0.041808	HCF173
AT1G48040	227.735	-0.54778	0.172051	-3.18382	0.00145347	0.0418896	x
AT1G07170	328.527	0.540549	0.169832	3.18284	0.00145836	0.041974	x
AT4G13280	73.2001	-1.08163	0.33991	-3.1821	0.00146212	0.0420255	TPS12
AT3G20370	12602.9	-0.363401	0.114308	-3.17913	0.00147718	0.0424016	x
AT3G18000	6081.6	-0.396925	0.124876	-3.17855	0.00148013	0.0424289	NMT1
AT4G01550	322.681	-0.627263	0.197403	-3.17758	0.00148509	0.0425141	NAC69
AT5G35200	3533.33	-0.297667	0.0937199	-3.17613	0.00149253	0.0426155	x
AT4G19680	119.136	1.12721	0.354901	3.17611	0.00149262	0.0426155	IRT2
AT4G30160	3021.55	-0.269149	0.0847978	-3.17401	0.00150348	0.0428684	VLN4
AT2G47000	8728.15	-0.293322	0.0924322	-3.17338	0.00150678	0.042905	ABCB4
AT1G05850	10876.6	-0.290847	0.0916901	-3.17207	0.00151358	0.0430413	CTL1
AT1G78290	266.888	-0.727813	0.229535	-3.17081	0.00152012	0.0431699	SRK2C
AT5G65410	8.85793	4.6062	1.45401	3.16792	0.00153533	0.0435439	ZHD1
AT4G35380	1884.1	-0.444323	0.140301	-3.16693	0.00154058	0.0436348	BIG4
AT5G26340	1286.02	0.475802	0.150315	3.16537	0.00154888	0.0438116	STP13
AT5G51640	444.484	-0.475228	0.150188	-3.16422	0.00155498	0.0439261	YLS7
AT2G46390	496.716	0.850914	0.269025	3.16295	0.00156177	0.0440595	SDH8
AT3G59840	191.422	0.81764	0.258571	3.16215	0.00156611	0.0441237	x
AT5G02380	7198.48	0.492777	0.155951	3.15982	0.00157866	0.0444187	MT2B
AT1G15250	284.084	0.649659	0.205655	3.15898	0.00158322	0.0444287	RPL37A
AT3G29410	178.979	-0.841826	0.266512	-3.15869	0.00158482	0.0444287	TPS25
AT2G43780	503.439	0.599699	0.189862	3.15861	0.00158525	0.0444287	x
AT3G27400	240.463	-0.708713	0.22448	-3.15713	0.00159328	0.0445953	x
AT3G48240	48.8507	1.10717	0.351005	3.15429	0.0016089	0.0449431	x
AT2G02820	784.246	-0.396296	0.125645	-3.1541	0.00160992	0.0449431	MYB88
AT3G14225	35.22	-1.30985	0.415354	-3.15356	0.00161291	0.0449676	GLIP4
AT5G60660	1764.09	-0.506268	0.160579	-3.15277	0.00161732	0.0450319	PIP2-4
AT5G24410	332.637	-0.549844	0.174631	-3.14861	0.00164047	0.0456163	PGL4
AT1G04180	153.225	0.716454	0.227573	3.14824	0.00164258	0.0456163	YUC9
AT1G51840	1141.72	-0.384865	0.122298	-3.14694	0.0016499	0.04574	x
AT3G17130	26.1038	-1.89456	0.602082	-3.14669	0.00165132	0.04574	x
AT1G13670	563.502	-0.509408	0.161936	-3.14574	0.00165668	0.0458292	x
AT3G55960	1026.45	-0.378292	0.120304	-3.14446	0.00166394	0.0459705	x
AT1G60960	1187.64	-0.423079	0.134669	-3.14163	0.00168011	0.0463573	IRT3
AT2G39200	1091.45	-0.452789	0.144144	-3.14123	0.00168242	0.046361	MLO12
AT3G28500	22.7357	1.52331	0.485214	3.13946	0.00169258	0.0465431	RPP2C
AT5G17760	654.322	0.505869	0.161142	3.13928	0.00169361	0.0465431	x
AT3G03170	98.0313	0.792452	0.252474	3.13875	0.00169671	0.0465431	x
AT4G11800	855.294	-0.397074	0.126515	-3.13855	0.00169785	0.0465431	x
AT1G75280	1596.98	0.415632	0.132443	3.13819	0.00169993	0.0465431	x
AT4G39200	6975.29	0.357482	0.11398	3.13635	0.00171065	0.0467767	RPS25E
AT1G22650	128.484	0.672857	0.214583	3.13565	0.00171475	0.0468289	INVD
AT3G46020	61.1426	1.12404	0.358521	3.1352	0.00171735	0.0468401	x
AT4G28950	132.198	0.718243	0.229131	3.13464	0.00172066	0.0468704	ARAC7
AT3G01180	475.076	0.403069	0.128644	3.13321	0.00172904	0.0470386	SS2
AT1G70600	8555.39	0.419424	0.133893	3.13253	0.00173307	0.0470884	RPL27AC
AT2G30740	1461.91	-0.373534	0.11928	-3.13158	0.00173866	0.0471802	PTI12
AT1G14810	1740.56	0.323174	0.103362	3.12663	0.0017682	0.047892	x
AT5G23810	71.5862	0.974776	0.311785	3.12644	0.00176937	0.047892	AAP7
AT4G35320	257.839	-0.573225	0.183608	-3.122	0.00179628	0.0485587	x
AT2G47110	7990.91	0.384348	0.123141	3.1212	0.00180117	0.0486294	RPS27AB
AT4G13430	9033.08	0.350513	0.112351	3.11981	0.0018097	0.048798	IIL1
AT3G26720	2304.99	-0.432908	0.138785	-3.11928	0.00181296	0.0488243	x
AT2G16005	490.709	1.33988	0.429673	3.11836	0.00181858	0.0488967	ROSY1
AT4G16370	981.302	0.496288	0.159179	3.11781	0.00182202	0.0488967	ATOPT3
AT2G31585	358.333	-0.569232	0.182579	-3.11773	0.00182252	0.0488967	x
AT5G57170	91.2729	0.894439	0.287252	3.11378	0.00184705	0.0493963	x
AT3G59200	97.9733	0.885947	0.284554	3.11346	0.0018491	0.0493963	x
AT5G02270	3553.64	-0.548475	0.176168	-3.11337	0.00184967	0.0493963	ATNAP9
AT2G30230	123.044	-0.799823	0.25692	-3.11312	0.00185122	0.0493963	x
AT5G64250	3020.67	0.382398	0.122856	3.11258	0.00185459	0.0493963	x
AT2G23770	621.468	-0.461265	0.148203	-3.11239	0.00185578	0.0493963	LYK4
AT3G18200	779.094	0.583892	0.187617	3.11214	0.00185734	0.0493963	x
AT5G18790	178.175	0.772793	0.248354	3.11166	0.00186041	0.0494166	x
AT2G36710	11.1678	-4.45224	1.4314	-3.1104	0.00186835	0.0495659	PME15
AT4G11660	290.958	-0.824544	0.265157	-3.10965	0.0018731	0.0496302	HSFB2B
AT4G05200	1030.17	-0.358702	0.115438	-3.10731	0.00188801	0.0499222	CRK25
AT1G73280	476.073	-0.539002	0.17348	-3.107	0.00188996	0.0499222	SCPL3
AT1G25275	1002.95	0.637085	0.20506	3.10682	0.00189113	0.0499222	x
AT2G43590	2842.74	-0.523213	0.168451	-3.10602	0.00189623	0.0499949	x
